## **PPAR $\gamma$ /ETV2 Axis Regulates Endothelial-to-Mesenchymal Transition in Pulmonary Hypertension**

Dong Hun Lee<sup>a,d,†</sup>, Minseong Kim<sup>a,l,†</sup>, Sarah S. Chang<sup>b,c,†</sup>, Andrew J. Jang<sup>e</sup>, Juyoung Kim<sup>a,d</sup>,  
Jing Ma<sup>b,c</sup>, Michael J. Passineau<sup>e</sup>, Raymond L. Benza<sup>f</sup>, Harry Karmouty-Quintana<sup>g,h</sup>, Wilbur A.  
Lam<sup>i</sup>, Roy L. Sutliff<sup>b,c,j</sup>, C. Michael Hart<sup>b,c</sup>, Changwon Park<sup>a,k,†,\*</sup>, and Bum-Yong Kang<sup>a,b,c,\*</sup>

<sup>a</sup>Department of Pediatrics, Division of Hematology, Oncology, and BMT, <sup>b</sup>Department of  
Medicine, Division of Pulmonary, Allergy, Critical Care, and Sleep Medicine, Emory University  
School of Medicine, and <sup>c</sup>Atlanta Veterans Healthcare System, Decatur, GA,

<sup>d</sup>Department of Biological Sciences, Chonnam National University, 77 Yongbong-ro, Buk-gu,  
Gwangju, 61186, Republic of Korea

<sup>e</sup>Cardiovascular Institute, Department of Medicine, Allegheny Health Network, Pittsburgh, PA.

<sup>f</sup>The Ohio State University Wexner Medical Center, Columbus, Ohio,

<sup>g</sup>Department of Biochemistry and Molecular Biology, <sup>h</sup>Divisions of Critical Care & Pulmonary  
and Sleep Medicine, Department of Internal Medicine, McGovern Medical School, University of  
Texas Health Science Center at Houston, Houston, TX

<sup>i</sup>Georgia Institute of Technology, Atlanta, GA, USA.

<sup>j</sup>National Heart, Lung and Blood Institute. National Heart, Lung, and Blood Institute. Bethesda,  
MD, USA.

<sup>k</sup>Department of Cellular and Molecular Physiology, Louisiana State University Health Science Center, Shreveport, LA

**Running Title:** PPAR $\gamma$ /ETV2 regulates EndoMT in PH

**†These authors contributed equally to this work**

**\*Co-correspondence:**

**Bum-Yong Kang**, PhD, Pulmonary and Critical Care Section, Atlanta VA HCS, 1670 Clairmont Rd. (151-P), Decatur, GA 30033; Phone: 404-321-6111 ext 206143; Fax: 404-728-7750; Email: Bum-Yong.Kang@emory.edu

**Changwon Park**, PhD., Department of Cellular and Molecular Physiology, Louisiana State University Health Science Center, 1501 Kings highway, Shreveport, LA 71103; Phone: 318-675-6028; Email: cpar13@lsuhsc.edu

### **Author Contributions**

Conception, hypothesis delineation, and design, C.P. and B.Y.K.; acquisition of data, analysis, and interpretation, D.H.L., M.K., J.K., A.J.J., R.L.B., M.J.P., S.S.C., J.M., H.K.-Q., R.L.S., C.M.H., C.P., and B.Y.K.; writing of the article, C.P., W.A.L., C.M.H., and B.Y.K.

### **Acknowledgments**

This study was supported by funding from VA BLR&D Merit Review Award (I01 BX004263 to CMH), NIH National Heart, Lung, and Blood Institute R01 grants (HL102167 to CMH and RLS,

HL119291 to CP, and HL133053 to BYK). Data/Tissue samples provided by PHBI under the Pulmonary Hypertension Breakthrough Initiative (PHBI). Funding for the PHBI is provided under an NHLBI R24 grant, #R24HL123767, and by the Cardiovascular Medical Research and Education Fund (CMREF).

**Total word of abstract in manuscript: 191 words**

**Total word of body text in manuscript: 3976 words**

## ABSTRACT

Endothelial-to-mesenchymal transition (EndoMT) plays an important role in pulmonary hypertension (PH). Also, the molecular mechanisms regulating EndoMT in PH remain to be defined. In this study, we first showed that reduced expression of the transcription factors ETV2 (ETS variant 2) and PPAR $\gamma$  (Peroxisome Proliferator-Activated Receptor gamma) along with reduced endothelial markers and increased EndoMT markers were consistently observed in lungs and pulmonary artery endothelial cells (PAECs) of idiopathic pulmonary arterial hypertension (IPAH) patients, in hypoxia-exposed mouse lungs, human PAECs, and in induced EndoMT cells. Base on this observation, we aimed to investigate the function of ETV2 and PPAR $\gamma$  in EndoMT. We have explored the function of ETV2 and PPAR $\gamma$  and its mechanism in PH using in *Etv2*<sup>+/-</sup> mice or PPAR $\gamma$  KO mice. *Etv2*<sup>+/-</sup> mice spontaneously developed PH and right ventricular hypertrophy, associated with increased EndoMT markers and decreased EC markers. PPAR $\gamma$  transcriptionally activated the ETV2 promoter. Endothelial PPAR $\gamma$  expression in mice is positively correlated with ETV2 expression, but inversely with EndoMT markers. Overexpression of ETV2 in hypoxia-exposed rat pulmonary artery led to vascular relaxation. We conclude that PPAR $\gamma$ -ETV2 signaling can function as a novel pathway in PH pathogenesis by attenuating EndoMT.

**Keywords:** ETV2, PPAR $\gamma$ , Hypoxia, EndoMT, Endothelial-to-Mesenchymal Transition, Pulmonary hypertension.

## INTRODUCTION

Pulmonary hypertension (PH), defined as an elevation of the mean pulmonary artery pressure >20 mmHg including a pulmonary vascular resistance (PVR)  $\geq 3$  wU (wood unit), causes high morbidity and mortality (1-3). PH is characterized by pulmonary endothelial dysfunction and abnormal proliferation of pulmonary vascular wall cells, vascular remodeling, and muscularization of small pulmonary vessels (4). These structural and functional alterations in the pulmonary vasculature increase pulmonary vascular resistance resulting in progressive right-sided heart failure and death.

Recent studies show that endothelial to mesenchymal transition (EndoMT) contributes to the pathogenesis of PH. EndoMT involves a phenotypic “switch” in which endothelial cells (ECs) lose endothelial and gain mesenchymal phenotypic features. This phenotypic and functional switch can ultimately lead to pulmonary vascular remodeling, which is characterized by extensive accumulation of cells expressing smooth muscle actin ( $\alpha$ SMA) within the microvessels of the hypertensive lung and in fibroblasts (5, 6). Lineage tracking analysis in mice demonstrated that EndoMT contributes to a spectrum of structural changes including thickening of the adventitial, medial and intimal layers of the pulmonary artery (PA) wall, medial hypertrophy of muscular arteries, and muscularization of small pulmonary arterioles (7). Further, studies in a mouse PH model (8) and histological analysis of human patient samples (9) suggested EndoMT as a potential mechanism of distal pulmonary arteriole muscularization (9, 10). However, the molecular mechanisms controlling these events have yet to be fully elucidated and constitute the focus of the current study.

ETS Variant Transcription Factor 2 (ETV2), also known as ER71, belongs to the ETS transcription factor family classified by the presence of the conserved ETS DNA binding domains. ETV2 functions as a critical regulator of the vertebrate cardiovascular system (10). We have demonstrated that *Etv2* deficient mouse embryos exhibited complete absence of the embryonic vasculature and died in utero as early as embryonic day 10.5 (11). Similar results were reported from other studies using alternative strategies such as gene trap and knockin/knockout approaches (12, 13). Given the conserved functions from zebrafish (14) and *Xenopus er71* (15), it is clear that ETV2 is indispensable for cardiovascular development. We have also shown that endothelial *Etv2* is also required for new vessel formation in response to injury and that delivery of *Etv2* into ischemic hindlimbs promotes perfusion recovery with concomitant neovascularization (16). Further, studies including ours have revealed that ETV2 alone is sufficient to convert human dermal fibroblasts (HDFs) into functional ECs (17, 18). Taken together, these findings strongly suggest that ETV2 is a master regulator of EC fate.

PPAR $\gamma$  (Peroxisome Proliferator-Activated Receptor gamma) is a ligand-activated transcription factor of the nuclear hormone receptor superfamily (19). Its expression is reduced in the pulmonary vasculature of patients with severe PH (20). Furthermore, EC-targeted depletion of PPAR $\gamma$  caused spontaneous PH in mice (21). In contrast, activation of PPAR $\gamma$  with thiazolidinedione (TZD), PPAR $\gamma$  agonists attenuates PH or vascular remodeling in essentially every experimental model of PH in which they have been tested (22). These results suggest a pivotal role for PPAR $\gamma$  in the pathogenesis of PH. In this study, we investigated novel functions of the of PPAR $\gamma$ -ETV2 axis in regulating EndoMT in PH.

## MATERIALS AND METHODS

**Control and IPAH lung tissues and PAECs.** We obtained peripheral lung tissues from control or idiopathic pulmonary arterial hypertension (IPAH) patient specimens collected by the Pulmonary Hypertension Breakthrough Initiative (PHBI). IPAH samples were derived from 2 male and 3 female patients, 24-56 years old whereas control specimens were derived from 2 male and 3 female subjects, 29-55 years old who were failed donors. Human PAECs isolated from the lungs of control or IPAH subjects as described (23) were generously provided by Dr. Harry Karmouty-Quintana (University of Texas Health Science Center at Houston, Houston, TX).

***In vivo* mouse model of PH.** Male C57BL/6J mice, aged 8-12 weeks, were treated three times with weekly injections of the VEGF receptor antagonist, Sugen 5416 (SU, 20 mg/kg, subcutaneous injection) and exposed to hypoxia (HYP/SU, 10% O<sub>2</sub>) or normoxia (NOR/SU, 21% O<sub>2</sub>) for 3 weeks as reported (24). To assess PH, right ventricular systolic pressure (RVSP) and right ventricular hypertrophy (RVH) were measured in NOR/SU and HYP/SU-treated mice and in male *Etv2*<sup>+/-</sup> mice as reported (24). All animals were given unrestricted access to water and standard mouse chow. All animal studies were approved by the Institutional Animal Care and Use Committee of Emory University or the Atlanta Veterans Affairs Healthcare System.

***In vitro* cell models.** For the hypoxia experiment with ECs, HPAECs were exposed to NOR or HYP (1% O<sub>2</sub>) conditions for 72 hours as reported (25). To induce EndoMT, HAPECs (passage 2-6, ScienCell, Carlsbad, CA) were incubated with 0.1 ng/mL interleukin-1 beta (IL-1 $\beta$ ), 10

ng/mL tumor necrosis factor alpha (TNF $\alpha$ ), and 10 ng/mL transforming growth factor beta (TGF $\beta$ ) (*i*-EndoMT) or DMSO (CON) for 72 hours. Levels of HPAEC mRNAs associated with EndoMT were determined using qRT-PCR.

**Luciferase-based promoter assay.** HEK/293T cells ( $1.3 \times 10^5$ /well of a 24-well plate) were transfected with 2  $\mu$ g PPAR $\gamma$  expression plasmid (pcDNA3.1-FLAG-PPAR $\gamma$ ), 200 ng pGL3-ETV2 promoter (26), and 30 ng pRL-null by lipofectamine 2000 (Thermo Fisher Scientific, Waltham, MA). Forty-eight hours later, cells were harvested, and luciferase activity was measured using the Dual-Luciferase reporter assay system (Promega, Madison, WI) according to the manufacturer's instructions. Firefly luciferase values were divided by Renilla luciferase values to normalize transfection efficiency. Rosiglitazone (10  $\mu$ M) was added into the culture 12 hours prior to cell harvest.

**Scratch wound assay.** Human pulmonary artery endothelial cells HPAEC ( $3 \times 10^5$ /well) derived from 3 separate individuals were cultured in 6 well plates with ECM media (ScienCell, Carlsbad, CA) then treated with TGF- $\beta$  (10 ng/ml), TNF- $\alpha$  (10 ng/ml) and IL-1 $\beta$  (0.1 ng/ml) for 24 hours or 72 hours. Then, treated cells ( $2.8 \times 10^4$ /well) were cultured overnight to reach a confluent layer in a well separated by an insert (Culture-Insert 2 Well, ibidi GmbH, Germany). Subsequently, the insert was removed to generate the cell-free gap and add 1 ml of ECM media (ScienCell, Carlsbad, CA). Images were taken at 0 and 5 hours after incubation using a phase-contrast microscope. The area of the cell-free gap was calculated by Image J.



**Immunohistochemistry and Immunocytochemistry.** For each lung, sections from 10 separate tissue blocks were stained with hematoxylin and eosin for immunobiological analysis of pulmonary tissue. Cells in a slide glass were fixed with 4% paraformaldehyde and washed with 1x PBS for 5 times. Subsequently, cells were incubated with anti-ETV2, anti-SLUG, anti-TWIST, anti-DESMIN, anti-SMA, or anti-Ve-CDH5 antibody, followed by anti-mouse Alexa 488 or anti-rabbit 567 antibody. The images were taken using Olympus IX51.

**Collagen gel cell contraction assays.** Suspension of *i*-EndoMT cells ( $5 \times 10^5$ ) was mixed with collagen solution in a 1:4 ratio of cell suspension and collagen mixture provided in the cell contraction assay (Cell Biolabs) according to the manufacturer's instructions. The gels were imaged at 0h and 120 h later and analyzed by ImageJ software.

**ETV2 or PPAR $\gamma$  gain and loss of function.** For ETV2 or PPAR $\gamma$  loss of function, HPAECs were transfected with scrambled or *ETV2* or *PPAR $\gamma$*  RNAi duplexes (10 and 20 nM, Integrated DNA Technologies, Coralville, IA) using Lipofectamine 3000 transfection reagent (Invitrogen) according to the manufacturer's instructions. After transfection for 6 hours, the transfection media were replaced with EGM containing 5% FBS and incubated at room temperature for 72 hours. HPAEC lysates were then harvested and examined for *PPAR $\gamma$* , *ETV2*, *SLUG*, *TWIST1*, *DES*, *FSP1*,  *$\alpha$ SMA*, *PECAMI/CD31*, and *VE-Cad/CDH5* levels using qRT-PCR analysis. To overexpress ETV2, HPAECs were transfected with ETV2 plasmid constructs (1-2.5  $\mu$ g, oxETV2) or empty vector. For overexpression of PPAR $\gamma$ , HPAECs were transfected with adenovirus containing a PPAR $\gamma$  plasmid (AdPPAR $\gamma$ , 25-50 multiplicity of infection, MOI) or control GFP plasmid as we previously reported (27). After transfection for 6 hours, media were

replaced with fresh 5% FBS EGM, and HPAEC were then treated with normoxia (NOR, 21% O<sub>2</sub>) or hypoxia (HYP, 1% O<sub>2</sub>) for 72 hours. HPAEC lysates were then harvested and examined for *PPAR $\gamma$* , *ETV2*, *SLUG*, *TWIST1*, *DES*, *FSP1*,  *$\alpha$ SMA*, *PECAMI/CD31*, and *VE-Cad/CDH5* levels using qRT-PCR analysis.

**ETV2 overexpression in hypoxia-exposed rat pulmonary artery.** Secondary branch pulmonary artery segments, 3 mm in length, were isolated from hypoxia/sugen-treated Sprague-Dawley rat lungs (age 8-10 weeks) for 3 weeks and reoxygenation for 2 weeks and exposed to control conditions or  $1 \times 10^6$  ad*ETV2* for 24 hours. Following incubation, arteries were mounted on stainless steel wires, placed in an organ chamber containing Krebs-Henseleit buffer and connected to a Harvard apparatus differential capacitor force transducer. For each artery, resting tension was set to 10 mN the lowest resting tension that maximum contraction to 50mM KCl was observed. Data are recorded using PowerLab digital acquisition and analyzed using Chart Software. Results are expressed as mean + SEM. Concentration-response curves were generated to the contractile agonist phenylephrine (PE, 0.1 nM to 10  $\mu$ M) and ED<sub>80</sub> determined. Studies examining endothelium-dependent relaxation were carried out by measuring responses to methacholine (MCh; 1 nM to 10  $\mu$ M) and sodium nitroprusside (SNP; 0.1 nM to 1  $\mu$ M) as previously described (28, 29).

**mRNA quantitative real-time polymerase chain reaction (qRT-PCR) analysis.** To measure *PPAR $\gamma$* , *ETV2*, *SLUG*, *TWIST1*, *DES*, *FSP1*,  *$\alpha$ SMA*, *PECAMI/CD31*, and *VE-Cad/CDH5* levels, total RNAs in IPAH lungs, IPAH ECs, HPAECs, mouse lungs or *i*-EndoMT cells were isolated using the mirVana kit (Invitrogen). *PPAR $\gamma$* , *ETV2*, *SLUG*, *TWIST1*, *DES*,

*FSP1*,  *$\alpha$ SMA*, *PECAM1/CD31*, and *VE-Cad/CDH5* mRNA levels in the same sample were determined and quantified using specific mRNA primers as previously described (8). *GAPDH* mRNA levels were used as a control.

**Western blot analysis.** After treatment with rosiglitazone or vehicle, protein homogenates from mouse lungs or HPAECs were subjected to Western blot analysis as reported (8). Primary antibodies purchased from Santa Cruz Biotechnology (Santa Cruz, CA) included: SLUG mouse monoclonal antibody (1:500 dilution, Cat # SC-166476, 30 kDa), TWIST1 mouse monoclonal antibody (1:500 dilution, Cat # SC-81417, 28 kDa), DES mouse monoclonal antibody (1:500 dilution, Cat # SC-23879, 53 kDa), PECAM1 rabbit polyclonal antibody (1:500 dilution, Cat # SC-8306, 130 kDa) and VE-Cad rabbit polyclonal antibody (1:500 dilution, Cat # SC-28644, 130 kDa). Primary FSP1 mouse antibody (1:1000 dilution, Cat # 07-2274, 12 kDa) was purchased from EMD Millipore (Burlington, MA). Primary  $\alpha$ SMA rabbit polyclonal antibody (1:500 dilution, Cat # RB-9010-PO, 42 kDa) was purchased from Thermo Scientific (Waltham, MA). GAPDH rabbit polyclonal antibody (1:10,000 dilution, Cat # G9545, 37 kDa) was purchased from Sigma-Aldrich (St. Louis, MO). Relative protein levels were visualized using Li-Cor proprietary software, quantified Image J software, and normalized to GAPDH levels within the same lane.

**Statistical Analysis.** All data are presented as mean  $\pm$  standard error of the mean (SE). Data were analyzed using analysis of variance (ANOVA). Post hoc analysis used the Student Neuman Keuls test to detect differences between specific groups. In studies comparing only two experimental groups, data were analyzed with Student's t-test to determine the significance of

*PPAR $\gamma$ /ETV2 regulates EndoMT in PH*

treatment effects. The level of statistical significance was taken as  $p < 0.05$ . Statistical analyses were carried out using GraphPad Prism, Version 8.0 software (LaJolla, CA).

## RESULTS

### **ETV2 expression is downregulated in PH *in vivo* and *in vitro***

We first examined the expression of markers of EndoMT and ECs in lungs and pulmonary artery ECs (PAECs) isolated from patients with IPAH. As shown, the expression of EndoMT markers including *SLUG*, *TWIST1*, *DES*, *FSPI*, and  *$\alpha$ SMA* was increased in lungs (**Figure 1A**) and PAECs (**Figure 1B**) isolated from patients with IPAH, whereas the expression of endothelial markers, *PECAM1/CD31* and *VE-Cad/CDH5* was decreased. A similar finding was observed in mice following the induction of PH with hypoxia and the VEGF receptor antagonist, Sugen 5416 (HYP/Su) treatment (**Figure 1C**). Hypoxia was also sufficient to increase EndoMT markers and decrease endothelial markers in human PAECs (HPAECs) *in vitro* (**Figure 1D**). Previous studies showed that lack of *Etv2* leads to a complete absence of ECs (11-13) and forced expression of *ETV2* converted non-ECs into ECs (17, 18) suggesting that ETV2 has a determinant role for regulating EC functions. Thus, we hypothesized that the expression of ETV2 is downregulated in PH lungs leading to the transition of EC to mesenchymal cells. Interestingly, we found that *ETV2* levels were significantly reduced in both lungs (**Figure 1E**) and PAECs (**Figure 1F**) isolated from IPAH patients, in lung tissues from HYP/Su mice (**Figure 1G**), and in hypoxia-exposed HPAECs (**Figure 1H**) suggesting a potential role of ETV2 in PH.

### **Reductions in ETV2 stimulate EndoMT markers and PH *in vivo***

To determine the function of ETV2 in the pathogenesis of PH, we examined whether loss of ETV2 can lead to the development of PH. Since *Etv2*<sup>-/-</sup> mice are embryonic lethal (11), we used *Etv2*<sup>+/-</sup> mice which are fertile, normal in appearance and behavior, and display no overt overall or

vascular phenotype (16). However, we found that *Etv2*<sup>+/-</sup> mice (aged 12-16 weeks) developed mild PH (**Figure 2A**) assessed by increased right ventricular systolic pressure (RVSP) and right ventricular hypertrophy (RVH) (**Figure 2B**). Importantly, enhanced positivity of  $\alpha$ SMA, a indicative of vascular remodeling (**Figure 2C**) in *Etv2*<sup>+/-</sup> mice. Compared to littermate controls, the expression of EndoMT markers was increased and endothelial markers were reduced in the lungs of *Etv2*<sup>+/-</sup> mice (**Figure 2D and E**). Further, we performed siRNA-mediated *ETV2* depletion in HPAEC and found induction of expression of EndoMT markers and reduction of endothelial markers in the cells (**Figure 2F and G**). Lentiviral-mediated-*ETV2* overexpression in HPAECs led to downregulation of the EndoMT markers and was able to increase the expression of *PECAM1* and *VE-Cad/CDH5* in HPAECs under hypoxic conditions (**Figure 2H and I**). Collectively, these results suggest that endothelial ETV2 could have functional significance in PH.

### **PPAR $\gamma$ functions as a direct upstream regulator of ETV2 expression**

Studies have demonstrated that activation of the nuclear hormone receptor PPAR $\gamma$  attenuates PH whereas loss of PPAR $\gamma$  promotes PH (22). As illustrated in Figure E1 in the online data supplement, PPAR $\gamma$  levels were reduced in lungs and PAECs isolated from IPAH patients, in HYP/SU mouse lungs, and in hypoxia-exposed HPAECs. As shown in **Figure 1 and 2**, the expression of ETV2 is well correlated with pathogenic features of PH, suggesting a potential role for the PPAR $\gamma$  and ETV2 axis in PH. Consistent with this postulate, our *in silico* analysis identified two putative PPREs (PPAR $\gamma$  Responsive Elements) within the *ETV2* promoter region (NM\_014209, data not shown). To determine whether PPAR $\gamma$  can transcriptionally activate the expression of ETV2, we performed a luciferase-based ETV2 promoter assay. As shown in

**Figure 3**, overexpression of PPAR $\gamma$  in HPAECs using adenovirus-mediated *PPAR $\gamma$*  transduction (AdPPAR $\gamma$ , **Figure 3A**) caused a significant increase in *ETV2* expression (**Figure 3B**). In addition, AdPPAR $\gamma$  enhanced the activity of the *ETV2* promoter (**Figure 3C**). The observed promoter activity was further increased upon treatment with the PPAR $\gamma$  ligand, rosiglitazone (RSG, 10  $\mu$ M), compared with non-stimulated, control plasmid (Mock)-transfected HPAECs (**Figure 3C**). Consistently, AdPPAR $\gamma$  overexpression with RSG treatment increases HPAEC *ETV2* expression in normoxic conditions and restores *ETV2* levels in hypoxic conditions (**Figure 3D**). Adenovirus-mediated-PPAR $\gamma$  overexpression in HPAECs also mitigated the hypoxia-induced increase in EndoMT markers and the reduced expression of EC markers (**Figure 3E**). Importantly, lung tissue isolated from endothelial-targeted *PPAR $\gamma$*  overexpressing (ePPAR $\gamma$ OX) mice (**Figure 3F**) showed enhanced expression of both *Etv2* (**Figure 3G**) and EC markers (**Figure 3H**) with reduced expression of EndoMT markers (**Figure 3H**). To further determine the relationship between PPAR $\gamma$  and *ETV2*, we performed a series of loss of function studies. First, HPAECs were treated with *PPAR $\gamma$*  siRNA causing ~60% knockdown of *PPAR $\gamma$*  (**Figure 4A**). Reduction of *PPAR $\gamma$*  effectively attenuated the level of *ETV2* mRNAs (**Figure 4B**), whereas *PPAR $\gamma$*  expression did not change in HPAECs transfected with *ETV2* siRNA (**Figure 4C**). Similarly, in endothelial-targeted *PPAR $\gamma$*  knockout (ePPAR $\gamma$ KO) mice, loss of *PPAR $\gamma$*  in ECs (**Figure 4D**) reduced *ETV2* expression (**Figure 4E**) and increased mesenchymal and reduced endothelial markers (**Figure 4F**) in lung homogenates *in vivo*. Collectively, these findings indicate that PPAR $\gamma$  functions as a direct upstream regulator of *ETV2* expression in ECs.

### ***In vitro* model of EndoMT**

To further investigate the role of ETV2 in EndoMT, we refined a model to induce EndoMT (termed induced-EndoMT, *i-EndoMT*) in HPAEC *in vitro* (30). HPAECs were treated with inflammatory mediators (IL-1 $\beta$ , TNF $\alpha$ , and TGF $\beta$ ) in time-/dose-ranging regimens (Figure E2 in the online data supplement). **Figure 5A** illustrates that these inflammatory mediators, which are increased in PH, caused HPAEC to lose cobblestone morphology and become elongated and spindle-shaped, consistent with EndoMT. Under these conditions, the expression of *PPAR $\gamma$* , *ETV2*, and EC markers was decreased, but EndoMT markers were increased (**Figure 5B-J**). In collagen gel contraction assays, *i-EndoMT* cells displayed enhanced gel contraction (dashed line in photomicrograph) to a fraction of the control gel contour (line graph) consistent with mesenchymal rather than endothelial functional characteristics (**Figure 5K**). Similarly, wound healing assays demonstrated that *i-EndoMT* promoted cell migration into a monolayer wound, which is also consistent with mesenchymal cell function (**Figure 5L**). These findings suggest that previously described upregulated pro-inflammatory pathways in PH are sufficient to reduce endothelial *PPAR $\gamma$*  and *ETV2* and downstream induction of EndoMT phenotypes.

### **ETV2 overexpression partially reverses *i-EndoMT* and IPAH lung fibroblasts**

To further explore the ability of ETV2 to reverse EndoMT, PAECs were infected with lentiviral particles of *ETV2* undergoing *i-EndoMT*. As shown in **Figure 6A**, inducible overexpression of *ETV2* leads to a significantly reduced number of cells with mesenchymal morphology, compared to control. Cells overexpressing *ETV2* under *i-EndoMT* had decreased expression of mesenchymal markers with increased EC makers, compared to control (**Figure 6B and C**). Similar results were found when *PPAR $\gamma$*  was overexpressed (**Figure 6D**). More importantly, overexpression of *ETV2* converted lung fibroblasts derived from IPAH patients to cells



displaying EC features (**Figure 6E-G**). Hypoxia/Sugen exposure is associated with impaired endothelium-dependent relaxation of pulmonary arteries (31). Based on hypoxia-induced decreases in ETV2 and increases in EndoMT markers, we examined whether restored ETV2 expression can improve endothelium-dependent relaxation of pulmonary arteries isolated from rats treated with the hypoxia/Sugen protocol. Overexpression of ETV2 using an adenovirus showed a strong tendency of enhanced vascular relaxation, compared to controls (**Figure 6I**). These results suggest that the *ETV2* is previously undescribed direct downstream target of PPAR $\gamma$  plays important functions in EndoMT and thus potentially PH pathogenesis.

## DISCUSSION

The current study provides several novel observations that could advance understanding of PH pathogenesis; 1) ETV2 is downregulated in lungs and PAECs from patients with IPAH, in lungs of mice with PH caused by HYP/Su, in hypoxia-exposed HPAECs, and in *i*-EndoMT cells. 2) Reduction of ETV2 (i.e., *Etv2*<sup>+/-</sup> mice) leads to a spontaneous development of PH, augmented RVH, and increased expression of EndoMT markers. 3) PPAR $\gamma$  acts as an upstream regulator of ETV2 expression. 4) Sustained expression of PPAR $\gamma$  or ETV2 in ECs inhibits the progression of EndoMT. 5) ETV2 is able to revert IPAH lung myofibroblasts to a more EC-like phenotype. Collectively, these findings suggest that the PPAR $\gamma$ -ETV2 axis and the regulation of EndoMT play an important role in PH (**Figure 6I**).

PH is a chronic cardiopulmonary disorder that causes significant morbidity and mortality (1, 3, 32, 33). Current targeted therapies in PH fail to reverse pulmonary vascular remodeling and are frequently not recommended for patients with more common forms of PH (34, 35). These observations indicate that a greater understanding of PH pathogenesis may permit more effective therapeutic strategies. Recent studies using cell lineage tracking analysis have shown that EndoMT contributes to the initiation and progression of PH (5, 9, 30). This role of EndoMT was further supported by the colocalization of von Willebrand factor and  $\alpha$ SMA in pulmonary endothelium from HYP/Su rodent models and PAH patients (30). However, the molecular mechanisms underlying EndoMT in the pathogenesis of PH remain largely unknown. In this study, we propose the PPAR $\gamma$ -ETV2 axis as a key mechanism in regulating EndoMT in PH.

ETV2 functions as a master regulator for EC generation and function (10, 36). While deficiency in *Etv2* leads to a complete lack of vascular ECs (11, 12), forced expression of ETV2 is sufficient to reprogram non-ECs including mesenchymal cells such as human dermal fibroblasts into functional ECs (17, 18). These findings suggested that substantial loss of EC in the progression of PH could be due to reduced expression of ETV2. In agreement with this hypothesis, we found a significant reduction in ETV2 expression in clinical and experimental PH lung samples. Reduction of ETV2 (*Etv2*<sup>+/-</sup> mice) was sufficient to induce spontaneous PH and RVH in mice as well as upregulated expression of EndoMT makers and concomitant reductions of EC markers. These results strongly suggest the functional significance of ETV2 in PH. Although the precise molecular mechanisms by which ETV2 regulates PH is unknown, it is clear that ETV2 acts as a direct transcriptional regulator of diverse EC genes including CDH5 and CD31 (37). In addition, a recent report showed that ETV2 can regulate the expression of Robo4, one of the critical EC genes via DNA methylation (38). Further, we showed that ETV2 functions with valproic acid, a histone acetylation modifier in direct cell reprogramming (18). These findings suggest that decreased expression of ETV2 in PH induces inactivation of EC gene expression and loss of normal EC function. Currently, it is not known whether the increase of mesenchymal cells in PH is a direct outcome of ETV2 downregulation or secondary to the loss of ECs. The molecular mechanisms of ETV2-EndoMT remain an area of active investigation in our laboratories.

The current study extends the field by providing novel insights into the regulation of ETV2 expression in PH. Given the established role of PPAR $\gamma$  in PH pathobiology, we performed *in silico* analysis of the upstream promoter region of ETV2 and identified several putative PPAR $\gamma$

binding sites. Our results showed that PPAR $\gamma$  can transcriptionally activate ETV2 expression. This finding was further supported by a series of experiments *in vivo* and *in vitro*. Mice lacking endothelial *Ppar $\gamma$*  exhibited a reduced level of expression of *Etv2* in lungs, while mice overexpressing endothelial *Ppar $\gamma$*  showed augmented level of *Etv2*. Overexpression or knockdown experiments *in vitro* further substantiated these results. Collectively, these data suggest that PPAR $\gamma$  regulates PH in part through direct transcriptional activation of ETV2. Therefore, further studies to determine the functional consequences of the PPAR $\gamma$ -ETV2 axis in PH *in vivo* will be warranted.

One of the key findings of this study was to refine *in vitro* model which can mimic EndoMT *in vivo*. A recent study demonstrated that a combination of inflammatory mediators (IL-1 $\beta$ , TNF $\alpha$ , and TGF $\beta$ ) induced EndoMT (30). The current study extends this report to demonstrate that these three inflammatory mediators phenotypically switched not only endothelial cells (cobblestone morphology ) to mesenchymal cells (elongated, spindle-shaped myofibroblastic cell morphology) *in vitro*, but also induced functional alterations including enhanced contractile and migratory phenotypes in *i*-EndoMT cells. Consistent with these phenotypic and functional features, *i*-EndoMT cells expressed higher levels of EndoMT markers with downregulated levels of *ETV2* and *PPAR $\gamma$* . Importantly, we found that overexpression of *PPAR $\gamma$*  or *ETV2* was able to reduce the expression of mesenchymal markers in cells undergoing *i*-EndoMT, suggesting the potential role of PPAR $\gamma$  and ETV2 in EndoMT.

Recent studies have shown that ETV2 can directly reprogram non-ECs into ECs (17, 18). In addition, delivery of lentiviral *ETV2* into ischemic hindlimbs or infarcted heart promotes

recovery of ischemic damage as evidenced by enhanced perfusion and cardiac functions, respectively (16, 39). Interestingly, massive neovascularization also was accompanied in the damaged tissues upon the overexpression of ETV2, suggesting its potent function in endothelial reprogramming and functional recovery of vascular defects. In this study, we showed that PAH-derived lung myofibroblasts acquire EC characteristics while losing a mesenchymal phenotype when *ETV2* was overexpressed. Further, overexpression of ETV2 showed improved vascular relaxation in rat pulmonary arteries treated with the hypoxia/Sugen. These results suggest that ETV2 could be a therapeutic target for PH in potentially reverting mesenchymal cells to functional ECs.

In summary, to our knowledge, the current study provides for the first time uncovering novel functions of the PPAR $\gamma$ /ETV2 axis in regulating EndoMT during the pathogenesis of PH. Thus, the outcome of the proposed studies will advance current knowledge on EndoMT in PH and provide a new therapeutic paradigm for treating PH patients.

### **Author disclosures**

The authors have no competing interests. The contents of this report represent the views of the authors and do not represent the views of the Department of Veterans Affairs or the United States Government.

## REFERENCES

1. Galie N, Manes A, Negro L, Palazzini M, Bacchi-Reggiani ML, Branzi A. A meta-analysis of randomized controlled trials in pulmonary arterial hypertension. *Eur Heart J* 2009; 30: 394-403.
2. Simonneau G, Montani D, Celermajer DS, Denton CP, Gatzoulis MA, Krowka M, Williams PG, Souza R. Haemodynamic definitions and updated clinical classification of pulmonary hypertension. *Eur Respir J* 2019; 53.
3. Lilienfeld DE, Rubin LJ. Mortality from primary pulmonary hypertension in the United States, 1979-1996. *Chest* 2000; 117: 796-800.
4. Rabinovitch M. Molecular pathogenesis of pulmonary arterial hypertension. *J Clin Invest* 2008; 118: 2372-2379.
5. Arciniegas E, Frid MG, Douglas IS, Stenmark KR. Perspectives on endothelial-to-mesenchymal transition: potential contribution to vascular remodeling in chronic pulmonary hypertension. *Am J Physiol Lung Cell Mol Physiol* 2007; 293: L1-8.
6. Sohal SS. Epithelial and endothelial cell plasticity in chronic obstructive pulmonary disease (COPD). *Respir Investig* 2017; 55: 104-113.
7. Suzuki T, Carrier EJ, Talati MH, Rathinasabapathy A, Chen X, Nishimura R, Tada Y, Tatsumi K, West J. Isolation and characterization of endothelial-to-mesenchymal transition cells in pulmonary arterial hypertension. *Am J Physiol Lung Cell Mol Physiol* 2018; 314: L118-L126.

8. Qiao L, Nishimura T, Shi L, Sessions D, Thrasher A, Trudell JR, Berry GJ, Pearl RG, Kao PN. Endothelial fate mapping in mice with pulmonary hypertension. *Circulation* 2014; 129: 692-703.
9. Ranchoux B, Antigny F, Rucker-Martin C, Hautefort A, Pechoux C, Bogaard HJ, Dorfmueller P, Remy S, Lecerf F, Plante S, Chat S, Fadel E, Houssaini A, Anegon I, Adnot S, Simonneau G, Humbert M, Cohen-Kaminsky S, Perros F. Endothelial-to-mesenchymal transition in pulmonary hypertension. *Circulation* 2015; 131: 1006-1018.
10. Oh SY, Kim JY, Park C. The ETS Factor, ETV2: a Master Regulator for Vascular Endothelial Cell Development. *Mol Cells* 2015; 38: 1029-1036.
11. Lee D, Park C, Lee H, Lugus JJ, Kim SH, Arentson E, Chung YS, Gomez G, Kyba M, Lin S, Janknecht R, Lim DS, Choi K. ER71 acts downstream of BMP, Notch, and Wnt signaling in blood and vessel progenitor specification. *Cell Stem Cell* 2008; 2: 497-507.
12. Ferdous A, Caprioli A, Iacovino M, Martin CM, Morris J, Richardson JA, Latif S, Hammer RE, Harvey RP, Olson EN, Kyba M, Garry DJ. Nkx2-5 transactivates the Ets-related protein 71 gene and specifies an endothelial/endocardial fate in the developing embryo. *Proc Natl Acad Sci U S A* 2009; 106: 814-819.
13. Kataoka H, Hayashi M, Nakagawa R, Tanaka Y, Izumi N, Nishikawa S, Jakt ML, Tarui H, Nishikawa S. Etv2/ER71 induces vascular mesoderm from Flk1+PDGFRalpha+ primitive mesoderm. *Blood* 2011; 118: 6975-6986.
14. Sumanas S, Lin S. Ets1-related protein is a key regulator of vasculogenesis in zebrafish. *PLoS Biol* 2006; 4: e10.
15. Neuhaus H, Muller F, Hollemann T. Xenopus er71 is involved in vascular development. *Dev Dyn* 2010; 239: 3436-3445.

16. Park C, Lee TJ, Bhang SH, Liu F, Nakamura R, Oladipupo SS, Pitha-Rowe I, Capoccia B, Choi HS, Kim TM, Urao N, Ushio-Fukai M, Lee DJ, Miyoshi H, Kim BS, Lim DS, Apte RS, Ornitz DM, Choi K. Injury-Mediated Vascular Regeneration Requires Endothelial ER71/ETV2. *Arteriosclerosis, thrombosis, and vascular biology* 2016; 36: 86-96.
17. Morita R, Suzuki M, Kasahara H, Shimizu N, Shichita T, Sekiya T, Kimura A, Sasaki K, Yasukawa H, Yoshimura A. ETS transcription factor ETV2 directly converts human fibroblasts into functional endothelial cells. *Proc Natl Acad Sci U S A* 2015; 112: 160-165.
18. Lefever TW, Lee YO, Kovach AL, Silinski MA, Marusich JA, Thomas BF, Wiley JL. Delivery of nicotine aerosol to mice via a modified electronic cigarette device. *Drug Alcohol Depend* 2017; 172: 80-87.
19. Duan SZ, Usher MG, Mortensen RM. Peroxisome proliferator-activated receptor-gamma-mediated effects in the vasculature. *Circulation research* 2008; 102: 283-294.
20. Ameshima S, Golpon H, Cool CD, Chan D, Vandivier RW, Gardai SJ, Wick M, Nemenoff RA, Geraci MW, Voelkel NF. Peroxisome proliferator-activated receptor gamma (PPARgamma) expression is decreased in pulmonary hypertension and affects endothelial cell growth. *Circ Res* 2003; 92: 1162-1169.
21. Guignabert C, Alvira CM, Alastalo TP, Sawada H, Hansmann G, Zhao M, Wang L, El-Bizri N, Rabinovitch M. Tie2-mediated loss of peroxisome proliferator-activated receptor- $\{\gamma\}$  in mice causes PDGF receptor- $\{\beta\}$ -dependent pulmonary arterial muscularization. *Am J Physiol Lung Cell Mol Physiol* 2009; 297: L1082-1090.
22. Tseng V, Sutliff RL, Hart CM. Redox Biology of Peroxisome Proliferator-Activated Receptor-gamma in Pulmonary Hypertension. *Antioxid Redox Signal* 2019.



23. Masri FA, Xu W, Comhair SA, Asosingh K, Koo M, VasANJI A, Drazba J, Anand-Apte B, Erzurum SC. Hyperproliferative apoptosis-resistant endothelial cells in idiopathic pulmonary arterial hypertension. *Am J Physiol Lung Cell Mol Physiol* 2007; 293: L548-554.
24. Kang BY, Park KK, Kleinhenz JM, Murphy TC, Green DE, Bijli KM, Yeligar SM, Carthan KA, Searles CD, Sutliff RL, Hart CM. Peroxisome Proliferator-Activated Receptor gamma and microRNA 98 in Hypoxia-Induced Endothelin-1 Signaling. *Am J Respir Cell Mol Biol* 2016; 54: 136-146.
25. Kang BY, Park KK, Green DE, Bijli KM, Searles CD, Sutliff RL, Hart CM. Hypoxia mediates mutual repression between microRNA-27a and PPARgamma in the pulmonary vasculature. *PLoS One* 2013; 8: e79503.
26. Koyano-Nakagawa N, Shi X, Rasmussen TL, Das S, Walter CA, Garry DJ. Feedback Mechanisms Regulate Ets variant 2 (Etv2) Gene Expression and Hematoendothelial Lineages. *The Journal of biological chemistry* 2015.
27. Kang BY, Park KK, Kleinhenz JM, Murphy TC, Green DE, Bijli KM, Yeligar SM, Carthan KA, Searles CD, Sutliff RL, Hart CM. PPARgamma Activation Reduces Hypoxia-induced Endothelin-1 Expression through Upregulation of miR-98. *Am J Respir Cell Mol Biol* 2015.
28. Alexander JT, El-Ali AM, Newman JL, Karatela S, Predmore BL, Lefer DJ, Sutliff RL, Roback JD. Red blood cells stored for increasing periods produce progressive impairments in nitric oxide-mediated vasodilation. *Transfusion* 2013; 53: 2619-2628.
29. Kline ER, Kleinhenz DJ, Liang B, Dikalov S, Guidot DM, Hart CM, Jones DP, Sutliff RL. Vascular oxidative stress and nitric oxide depletion in HIV-1 transgenic rats are reversed by glutathione restoration. *American journal of physiology* 2008; 294: H2792-2804.

30. Good RB, Gilbane AJ, Trinder SL, Denton CP, Coghlan G, Abraham DJ, Holmes AM. Endothelial to Mesenchymal Transition Contributes to Endothelial Dysfunction in Pulmonary Arterial Hypertension. *Am J Pathol* 2015; 185: 1850-1858.
31. Christou H, Hudalla H, Michael Z, Filatava EJ, Li J, Zhu M, Possomato-Vieira JS, Dias-Junior C, Kourembanas S, Khalil RA. Impaired Pulmonary Arterial Vasoconstriction and Nitric Oxide-Mediated Relaxation Underlie Severe Pulmonary Hypertension in the Sugen-Hypoxia Rat Model. *J Pharmacol Exp Ther* 2018; 364: 258-274.
32. Adams AB, Durham MM, Kean L, Shirasugi N, Ha J, Williams MA, Rees PA, Cheung MC, Mittelstaedt S, Bingaman AW, Archer DR, Pearson TC, Waller EK, Larsen CP. Costimulation blockade, busulfan, and bone marrow promote titratable macrochimerism, induce transplantation tolerance, and correct genetic hemoglobinopathies with minimal myelosuppression. *J Immunol* 2001; 167: 1103-1111.
33. Salvaterra CG, Rubin LJ. Investigation and management of pulmonary hypertension in chronic obstructive pulmonary disease. *Am Rev Respir Dis* 1993; 148: 1414-1417.
34. George MG, Schieb LJ, Ayala C, Talwalkar A, Levant S. Pulmonary hypertension surveillance: United States, 2001 to 2010. *Chest* 2014; 146: 476-495.
35. Poor HD, Girgis R, Studer SM. World Health Organization Group III pulmonary hypertension. *Prog Cardiovasc Dis* 2012; 55: 119-127.
36. Lee DH, Kim TM, Kim JK, Park C. ETV2/ER71 Transcription Factor as a Therapeutic Vehicle for Cardiovascular Disease. *Theranostics* 2019; 9: 5694-5705.
37. Liu F, Li D, Yu YY, Kang I, Cha MJ, Kim JY, Park C, Watson DK, Wang T, Choi K. Induction of hematopoietic and endothelial cell program orchestrated by ETS transcription factor ER71/ETV2. *EMBO Rep* 2015; 16: 654-669.

38. Tanaka T, Izawa K, Maniwa Y, Okamura M, Okada A, Yamaguchi T, Shirakura K, Maekawa N, Matsui H, Ishimoto K, Hino N, Nakagawa O, Aird WC, Mizuguchi H, Kawabata K, Doi T, Okada Y. ETV2-TET1/TET2 Complexes Induce Endothelial Cell-Specific Robo4 Expression via Promoter Demethylation. *Scientific reports* 2018; 8: 5653.
39. Lee S, Lee DH, Park BW, Kim R, Hoang AD, Woo SK, Xiong W, Lee YJ, Ban K, Park HJ. In vivo transduction of ETV2 improves cardiac function and induces vascular regeneration following myocardial infarction. *Exp Mol Med* 2019; 51: 1-14.

## Figure legends

### Figure 1. Expression of ETV2 decreases in PH patients and in mice upon hypoxia.

**(A-B, and E-F)**, RNAs isolated from levels of IPAH lungs (A, E) or IPAH PAECs (B, F) were subjected to qRT-PCR. The results were expressed relative to *GAPDH* mRNA  $\pm$  SE as fold-change vs. CON. \* $p < 0.05$  vs NOR,  $n = 5$ . **(C and G)**, whole lung or pulmonary artery homogenates were collected from normoxic (21%) with sugen (NOR/SU, 20 mg/kg) or hypoxic (10% O<sub>2</sub>)/sugen (HYP/SU) mice for 3-weeks. Levels of lung EndoMT, EC marker, and *ETV2* were measured with qRT-PCR and expressed relative to lung *GAPDH* mRNA \* $p < 0.05$  vs NOR,  $n = 6$ . **(D and H)**, HPAECs (control) were exposed with normoxia (NOR, 21% O<sub>2</sub>) or hypoxia (HYP, 1% O<sub>2</sub>) for 72 hours. Mean levels of HPAEC EndoMT, EC marker, and *ETV2* were measured with qRT-PCR. All bars represent the mean EndoMT or EC marker mRNA levels relative to *GAPDH*  $\pm$  SE expressed as fold-change vs. NOR. \* $p < 0.05$  vs. NOR,  $n = 6$ .

### Figure 2. Reduction of ETV2 leads to the development of PH with increased expression of mesenchymal markers.

**(A)** Right ventricular systolic pressure (RVSP) was recorded in anesthetized mice with a pressure transducer. Each bar represents the mean RVSP in mmHg  $\pm$  SE.  $n = 5-8$ . **(B)** The ratio of the weight of the right ventricle to the left ventricle + septum [RV: (LV + S)] is presented as an index of right ventricular hypertrophy (RVH).  $n = 5-8$ . **(C)** Representative images of small mouse arterioles following H&E or  $\alpha$ SMA staining. **(D-E)** Levels of lung EndoMT or EC markers were measured with qRT-PCR (C) or with Western blotting (D). The qRT-PCR results were expressed relative to *GAPDH* mRNA or protein  $\pm$  SE as fold-change vs. CON. \* $p < 0.05$  vs NOR,  $n = 5-7$ . **(F-G)** For *ETV2* knockdown experiments, HPAECs were treated with scrambled (SCR) or *ETV2*

(10-20 nM) siRNAs for 6 hours then incubated for an additional 72 hours. **(H-I)** For *ETV2* gain of function, HDF or HPAECs were treated with *ETV2* plasmid constructs (ox*ETV2*, 1-2.5  $\mu$ g) or vector (VEC) constructs for 6 hours, then incubated for an additional 72 hours of normoxia (NOR) or hypoxia (HYP) exposure. qRT-PCR was performed for *ETV2*, EndoMT, or EC markers. Each bar represents mean  $\pm$  SE *ETV2* or EndoMT or EC markers level relative to *GAPDH* expressed as fold-change vs cells treated with SCR. n=3-6, \*p<0.05 vs VEC or NOR/VEC(-). +p<0.05 vs HYP/VEC(-).

**Figure 3. PPAR $\gamma$  activates *ETV2* expression in HPAECs and PPAR $\gamma$  gain-of-function increases *ETV2*, *PECAM1*, and *VE-Cad* expression and attenuates levels of EndoMT markers.**

**(A, B)** HPAECs treated with AdPPAR $\gamma$  (0-50 MOI) or green fluorescent protein (GFP) constructs were subjected to qRT-PCR analysis. **(C)** PPAR $\gamma$  expressing plasmid (PPAR $\gamma$ ) or control plasmid (Mock) was co-transfected with *ETV2* promoter- Luc plasmid and treated with dimethyl sulfoxide (RSG/-) or rosiglitazone (RSG/+) (10  $\mu$ M), then incubated for 72 hours. Fire fly luciferase activity was normalized by *Renilla* luciferase activity (right panel). **(D)** HPAECs were treated with AdPPAR $\gamma$  + RSG for 6 hours, then incubated with fresh medium for an additional 72 hours under normoxic (NOR) or hypoxic (HYP) condition. RGS was treated for last 24 hours. **(E)** HPAECs treated with AdPPAR $\gamma$  or green fluorescent protein (GFP) constructs were cultured under hypoxic condition and subjected to qRT-PCR analysis. Each bar represents mean  $\pm$  SE PPAR $\gamma$ , *ETV2*, EndoMT or EC markers level relative to *GAPDH* expressed as fold-change vs cells treated with GFP. n=5-6, \*p<0.05 vs GFP or HYP/AdPPAR $\gamma$ (-). +p<0.05 vs HYP/ AdPPAR $\gamma$ (-). **(F-H)** whole lungs were collected from littermate control (FulCon) or

endothelial-targeted PPAR $\gamma$  overexpression (ePPAR $\gamma^{OX}$ ) mice. Levels of lung *PPAR $\gamma$*  (F) or *ETV2* (G) or EndoMT and EC markers (H) were measured with qRT-PCR and expressed relative to *GAPDH* mRNA \*p<0.05 vs FulCon, n=6.

**Figure 4. Endothelial depletion of PPAR $\gamma$  reduces ETV2, PECAM1, and VE-Cad expression and increases levels of EndoMT markers in mouse lungs**

(A, B) HPAECs were treated with scrambled (SCR) or PPAR $\gamma$  (10-20 nM) siRNAs (A, B) or *ETV2* (10-20 nM) siRNAs (C) for 6 hours, washed with fresh medium, then incubated for an additional 72 hours. Each bar represents mean  $\pm$  SE *PPAR $\gamma$*  or *ETV2* level relative to *GAPDH* expressed as fold-change vs cells treated with SCR. n=3, \*p<0.05 vs SCR. (D-F) Whole lungs were collected from littermate control (LitCon) or endothelial-targeted PPAR $\gamma$  knockout (*ePPAR $\gamma^{KO}$* ) mice. Lung levels of *PPAR $\gamma$*  (D), *ETV2* (E), or EndoMT and EC markers (F) mRNA levels were measured using qRT-PCR in littermate control (LitCon) or endothelial-targeted PPAR $\gamma$  knockout (*ePPAR $\gamma^{KO}$* ) mice and expressed relative to *GAPDH* mRNA \*p<0.05 vs LitCon, n=6.

**Figure 5. Establishment of EndoMT (i-EndoMT) model**

(A-J) i-EndoMT cells were induced by addition of 0.1 ng/mL interleukin-1 beta (IL-1 $\beta$ ), 10 ng/mL tumor necrosis factor alpha (TNF $\alpha$ ), and 10 ng/mL transforming growth factor beta (TGF $\beta$ ) to HPAECs up to 72 hours. Mean HPAEC *PPAR $\gamma$* , *ETV2*, EndoMT or EC marker levels were measured with qRT-PCR. All bars represent the mean *PPAR $\gamma$* , *ETV2* or *SLUG* mRNA levels relative to *GAPDH*  $\pm$  SE expressed as fold-change vs. NOR. \*p<0.05 vs. NOR, n=3. (K) Cell contraction assay. CON or i-EndoMT cells were harvested at 72 hours after the treatment

and resuspended with a total of  $5 \times 10^5$  cells in a 1:4 ratio of cell suspension and collagen mixture provided in the cell contraction assay (Cell Biolabs). The gels were imaged at 0 hour and 72 hours post-incubation and analyzed by ImageJ software.  $n=2-3$ . Red arrow (dashed line in photomicrograph) indicates the cell contraction. **(L)** Wound healing assay. CON or i-EndoMT cells harvested at 72 hours post-treatment were harvested and replated in a wound healing chamber. Images were taken 5 hours later.

**Figure 6. Overexpression of ETV2 induces endothelial cell phenotype and promotes vascular relaxation.**

**(A-B)** HPAECs infected lentiviral particles of doxycycline-inducible *ETV2* (lenti-*ETV2*) were incubated with 0.1 ng/mL IL-1 $\beta$ , 10 ng/mL TNF $\alpha$ , and 10 ng/mL TGF $\beta$  for 72 hours. The resulting cells were then treated  $\pm$  Dox up to 6 days. A representative image of the resulting cells was shown in A (left panels). The cells were randomly selected and counted, the ratio of cobblestone morphology to elongated-spindle-shaped phenotype (A, right panel) was determined, and immunocytochemistry was performed (B). **(C, D)** HPAECs transfected with *ETV2* plasmid constructs (ox*ETV2*, 1  $\mu$ g) or vector (VEC) constructs (C) or infected with AdPPAR $\gamma$  (25 MOI) or green fluorescent protein (GFP) constructs were incubated with 0.1 ng/mL IL-1 $\beta$ , 10 ng/mL TNF $\alpha$ , and 10 ng/mL TGF $\beta$  to HPAECs for 72 hours. RNAs from the resulting cells were subjected to qRT-PCR analysis. Twenty-four hours before cell harvest (D), the cells were treated with rosiglitazone (RSG, 10  $\mu$ M). Each bar represents the mean  $\pm$  SE EndoMT or EC marker level relative to *GAPDH* as indicated. \* $p < 0.05$  vs. CON/VEC or *i*-EndoMT/GFP.  $n=3-4$ . **(E-G)** Lung fibroblasts of IPAH patients were infected with Ad*ETV2* and 3 days later, the resulting cells were imaged (E) and subjected to qRT-PCR analysis (F, G). The

*PPAR $\gamma$ /ETV2 regulates EndoMT in PH*

results are presented as fold-change vs. CON. \* $p < 0.05$  vs NOR,  $n = 5$ . **(H)** Secondary branch pulmonary artery segments (3 mm in length), were isolated from hypoxia/sugen-treated Sprague-Dawley rat lungs (age 8-10 weeks) for 3 weeks and reoxygenation for 2 weeks and exposed to control conditions or  $1 \times 10^6$  adETV2 for 24 hours. Studies examining endothelium-dependent relaxation were carried out by measuring responses to methacholine (MCh; 1 nM to 10  $\mu$ M) and sodium nitroprusside (SNP; 0.1 nM to 1  $\mu$ M). Results are expressed as mean + SEM. Concentration-response curves were generated to the contractile agonist phenylephrine (PE, 0.1 nM to 10  $\mu$ M) and ED<sub>80</sub> determined.  $n = 5-8$ . **(I)** A hypothetical schema defining the role of PPAR $\gamma$ /ETV2 on EndoMT in PH pathogenesis.



# Fig. 1

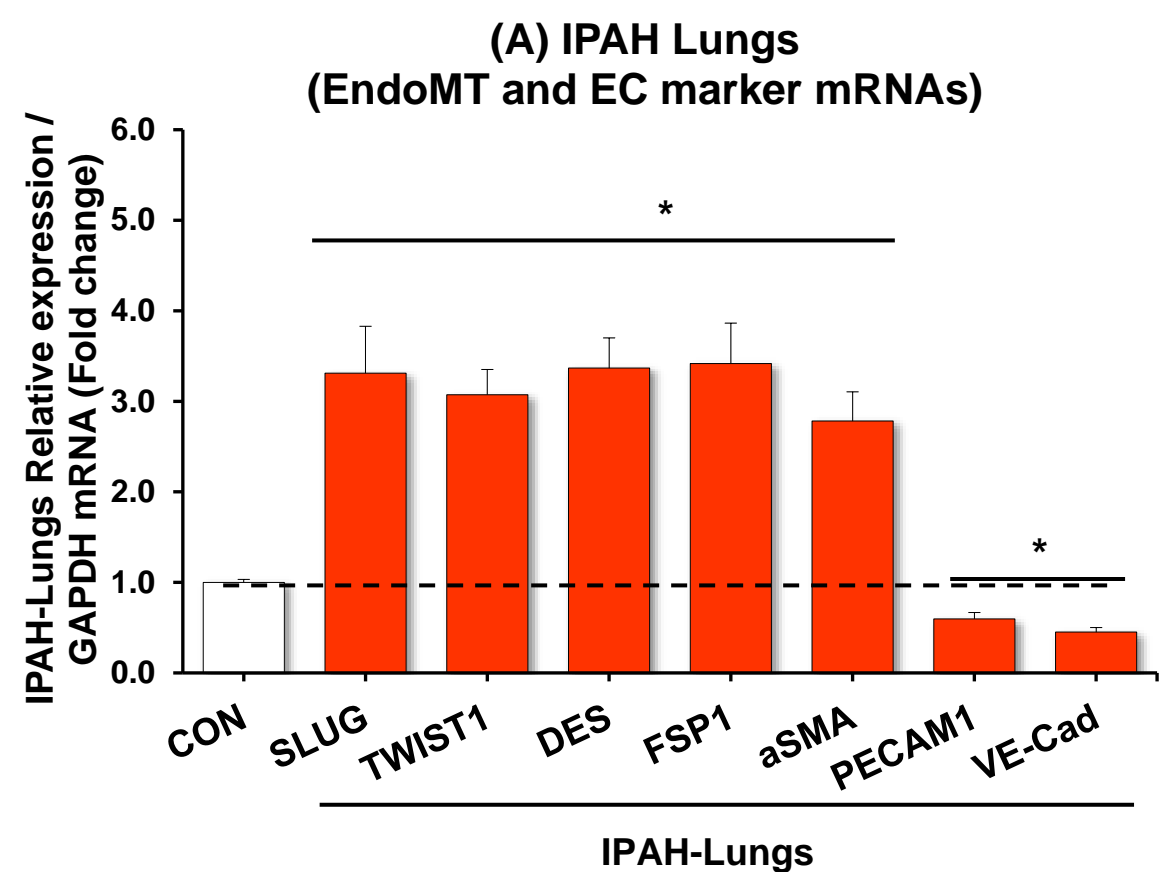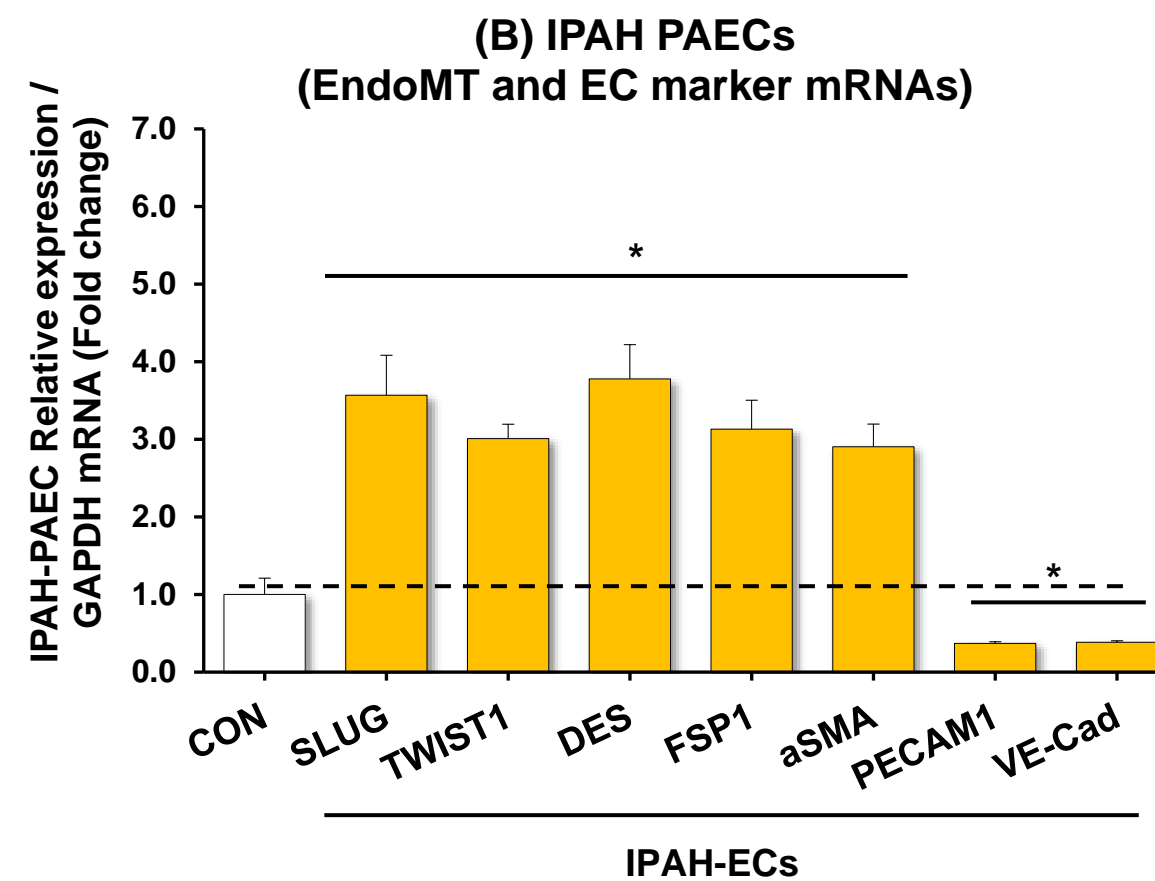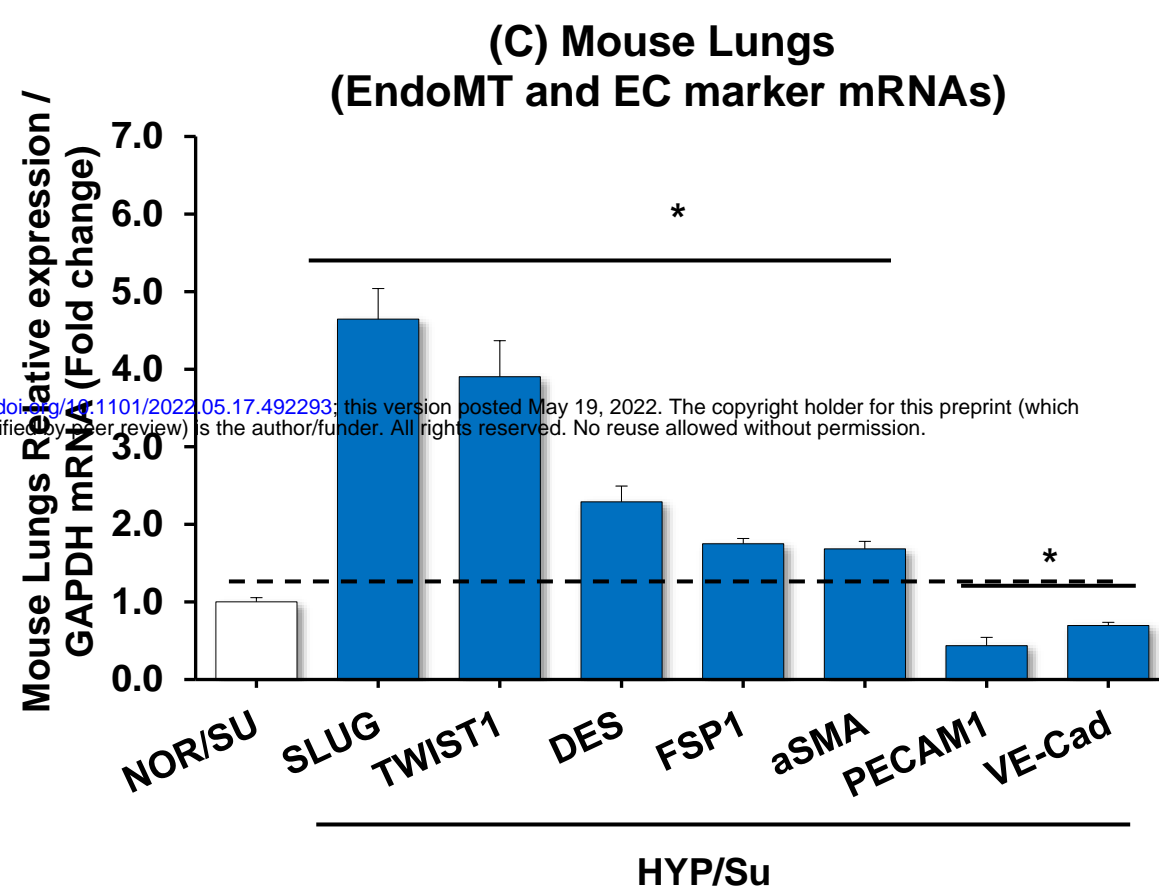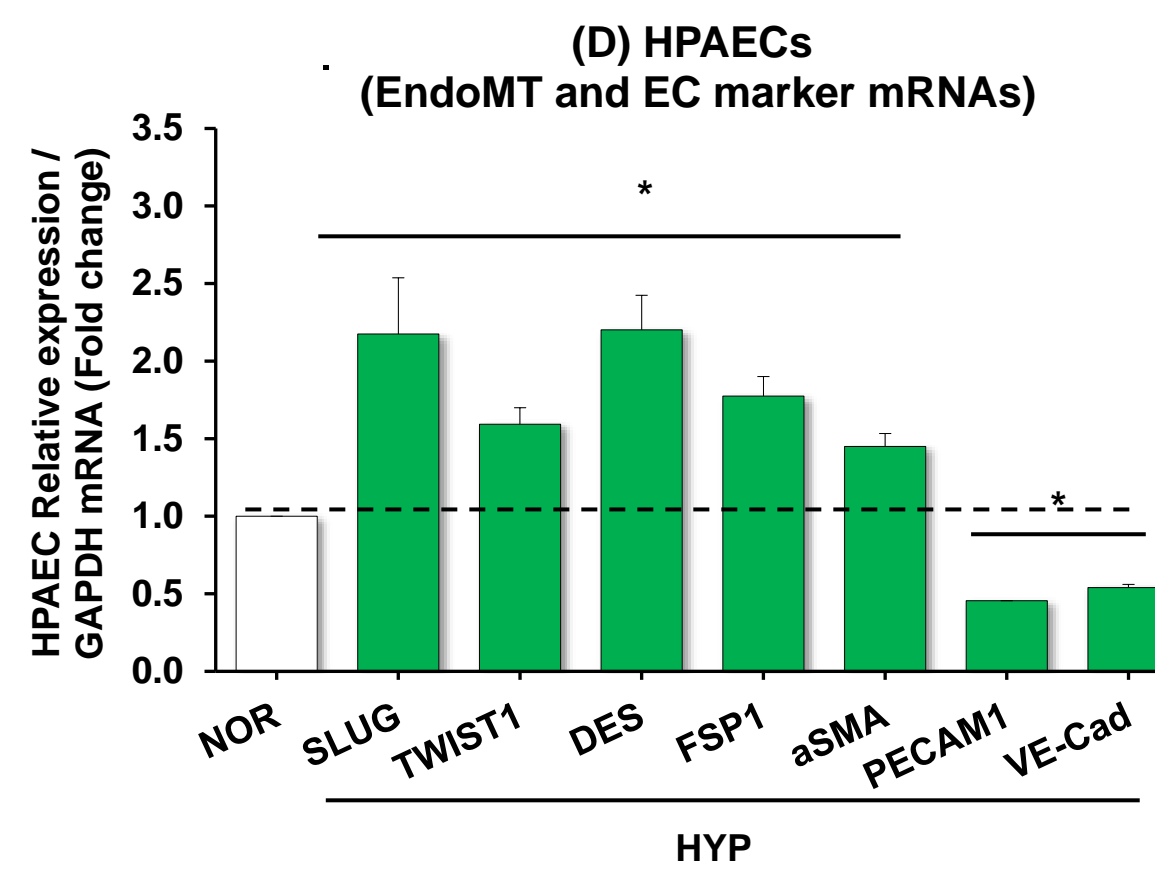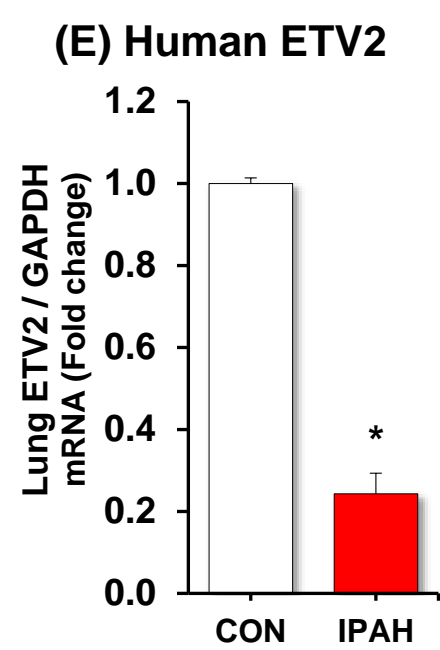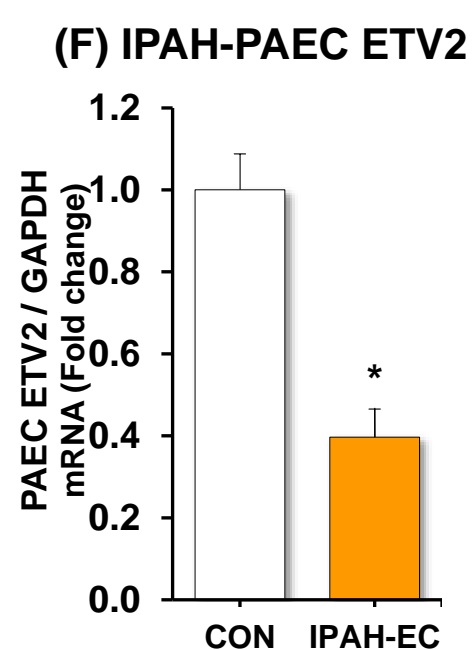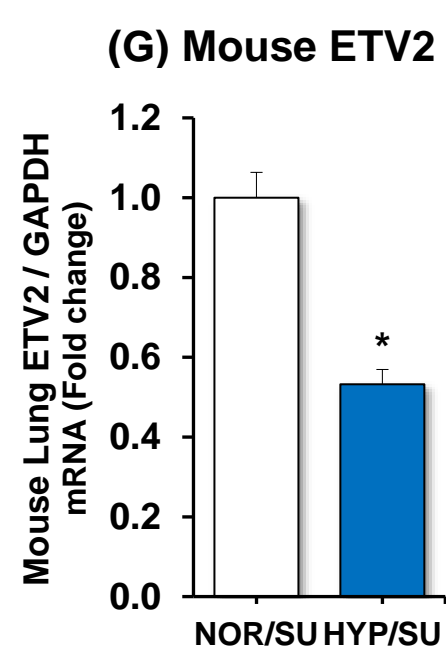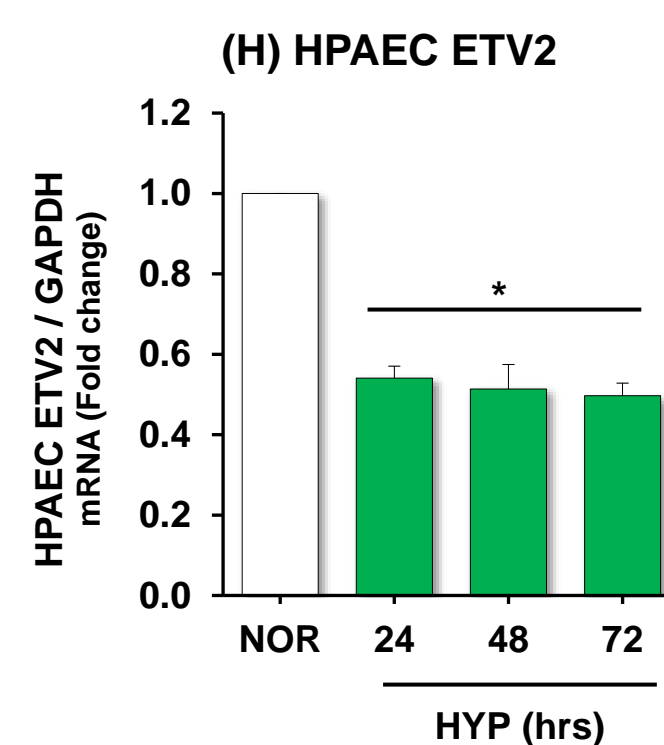

**Fig. 2**

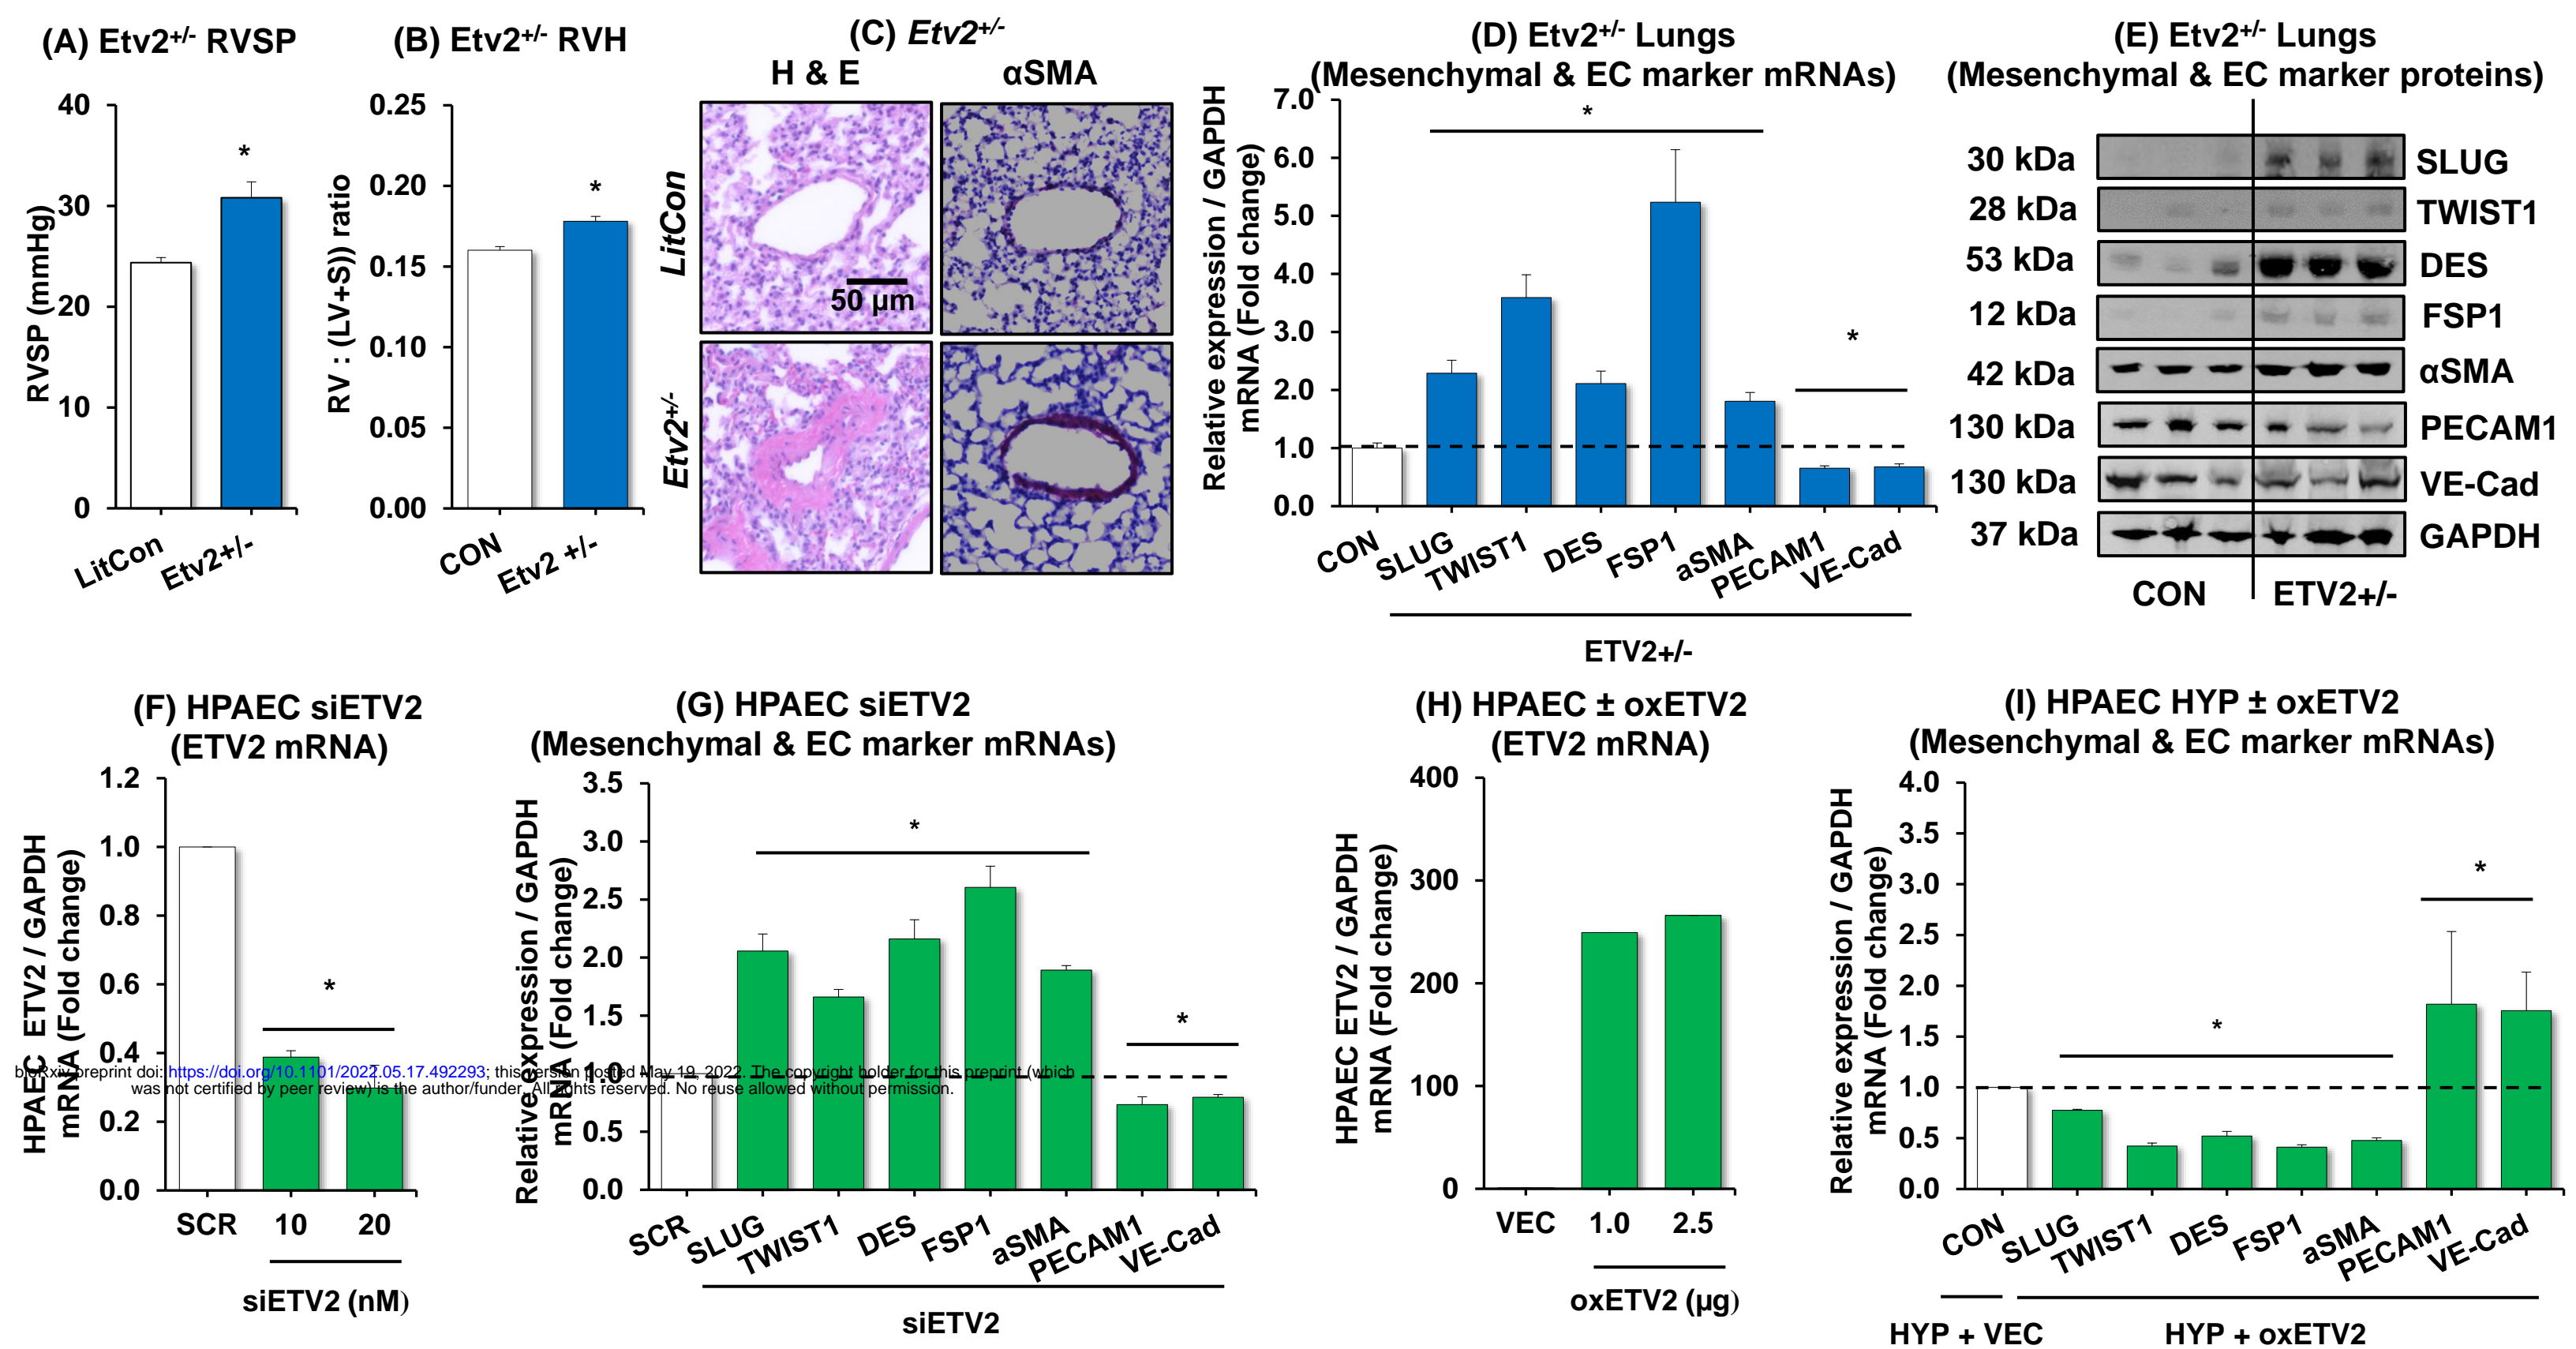

bioRxiv preprint doi: <https://doi.org/10.1101/2022.05.17.492293>; this version posted May 19, 2022. The copyright holder for this preprint (which was not certified by peer review) is the author/funder. All rights reserved. No reuse allowed without permission.

**Fig. 3**

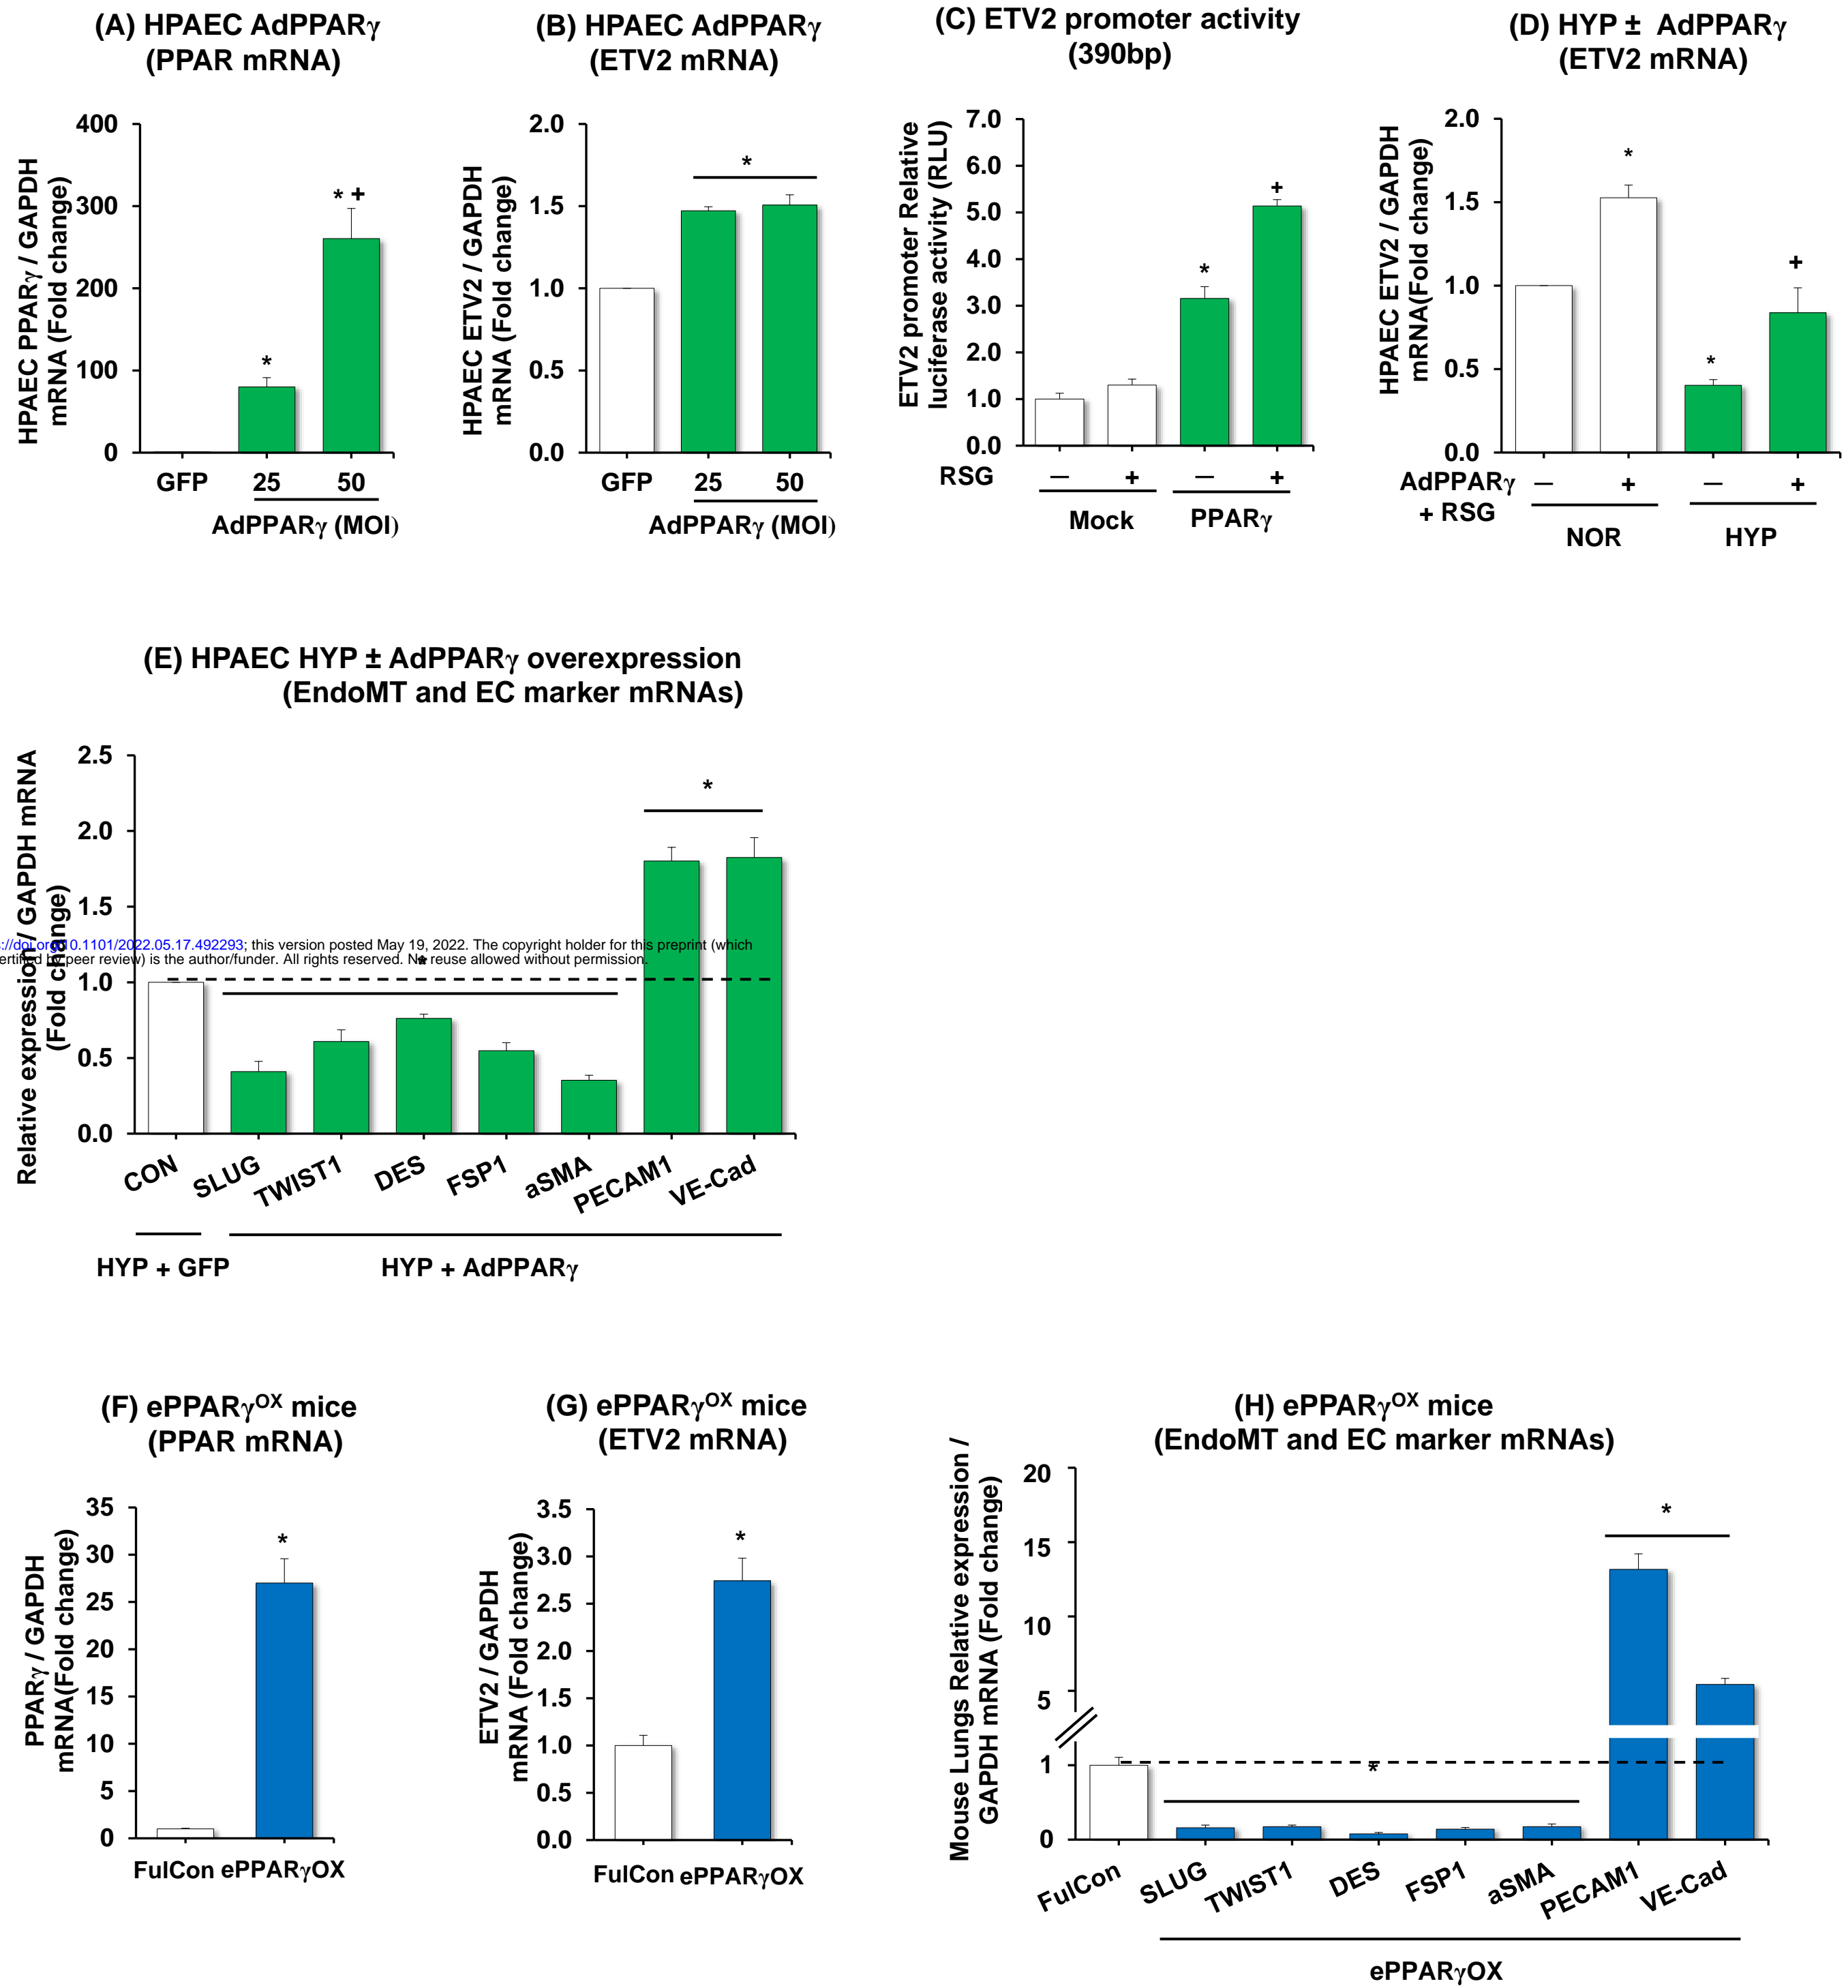

# Fig. 4

(A) HPAEC siPPAR $\gamma$   
(PPAR $\gamma$  mRNA)

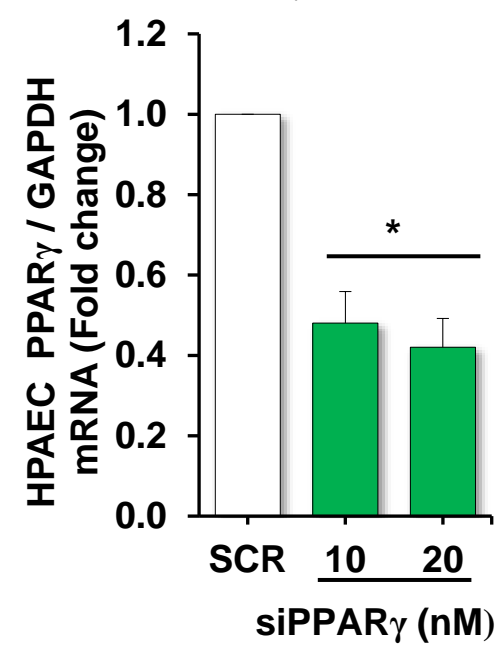

(B) HPAEC siPPAR $\gamma$   
(ETV2 mRNA)

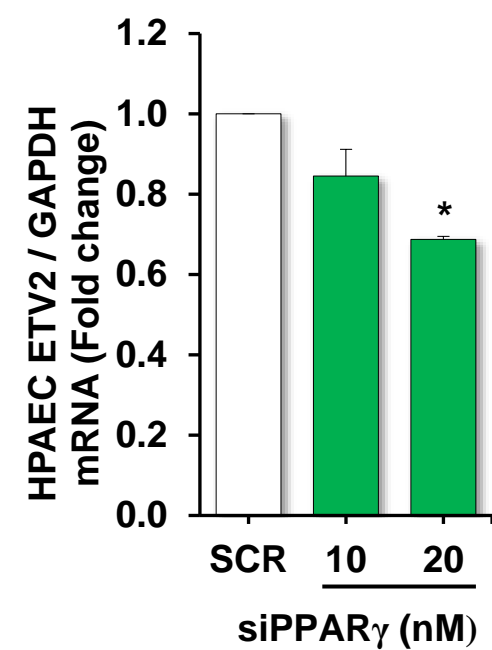

(C) HPAEC siETV2  
(PPAR $\gamma$  mRNA)

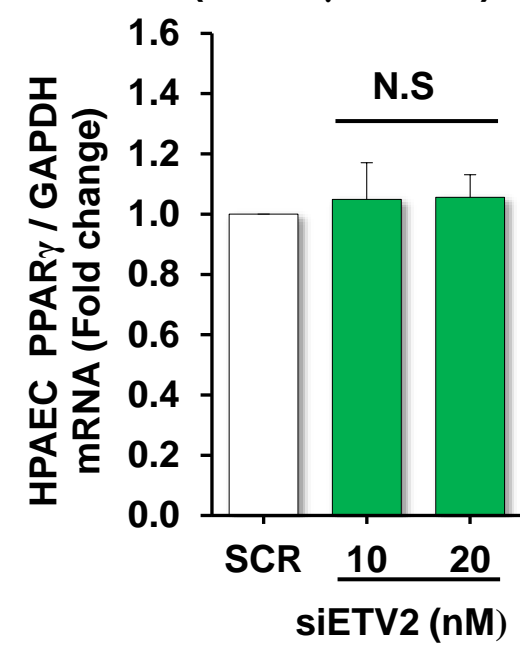

(D) ePPAR $\gamma$  KO mouse  
(PPAR $\gamma$  mRNA)

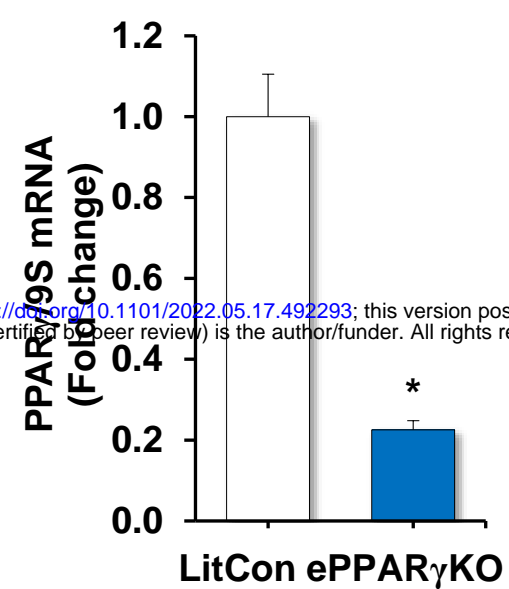

(E) ePPAR $\gamma$  KO mouse  
(ETV2 mRNA)

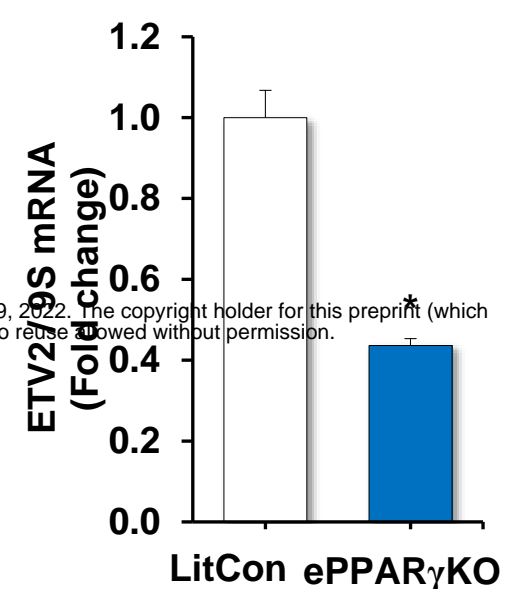

(F) ePPAR $\gamma$  KO mice  
(EndoMT and EC marker mRNAs)

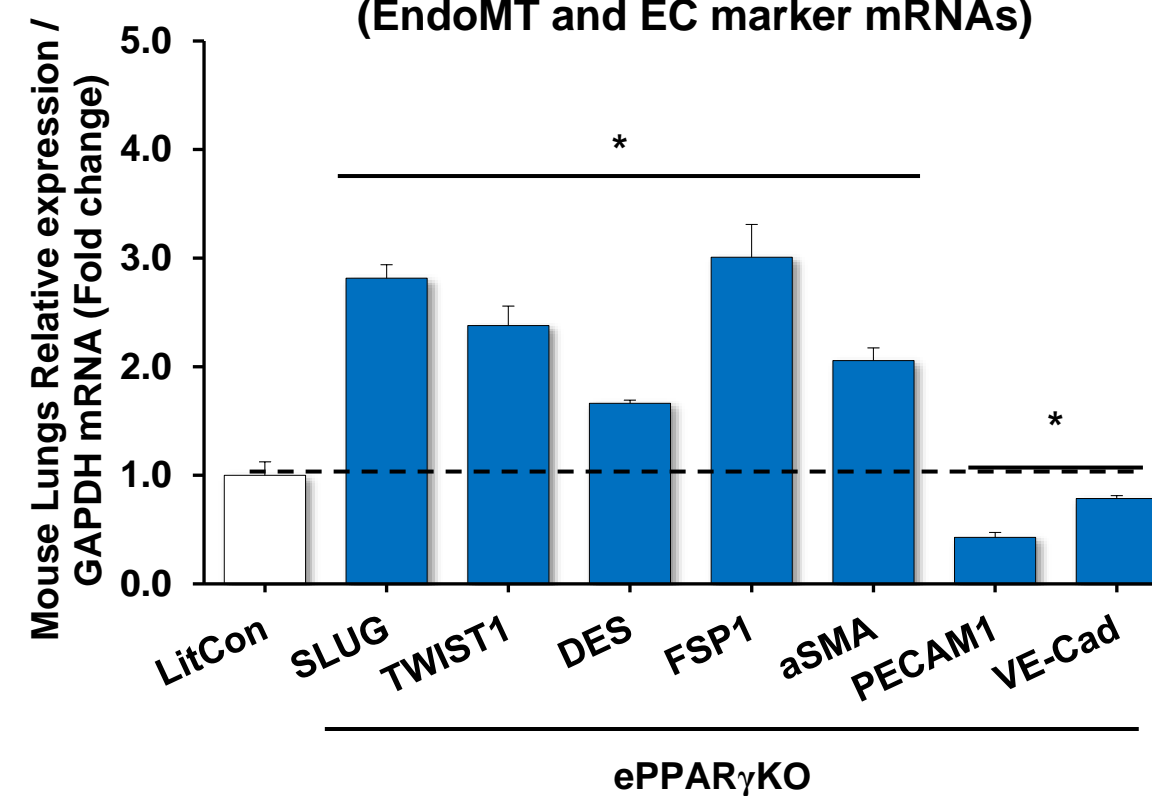

**Fig. 5**

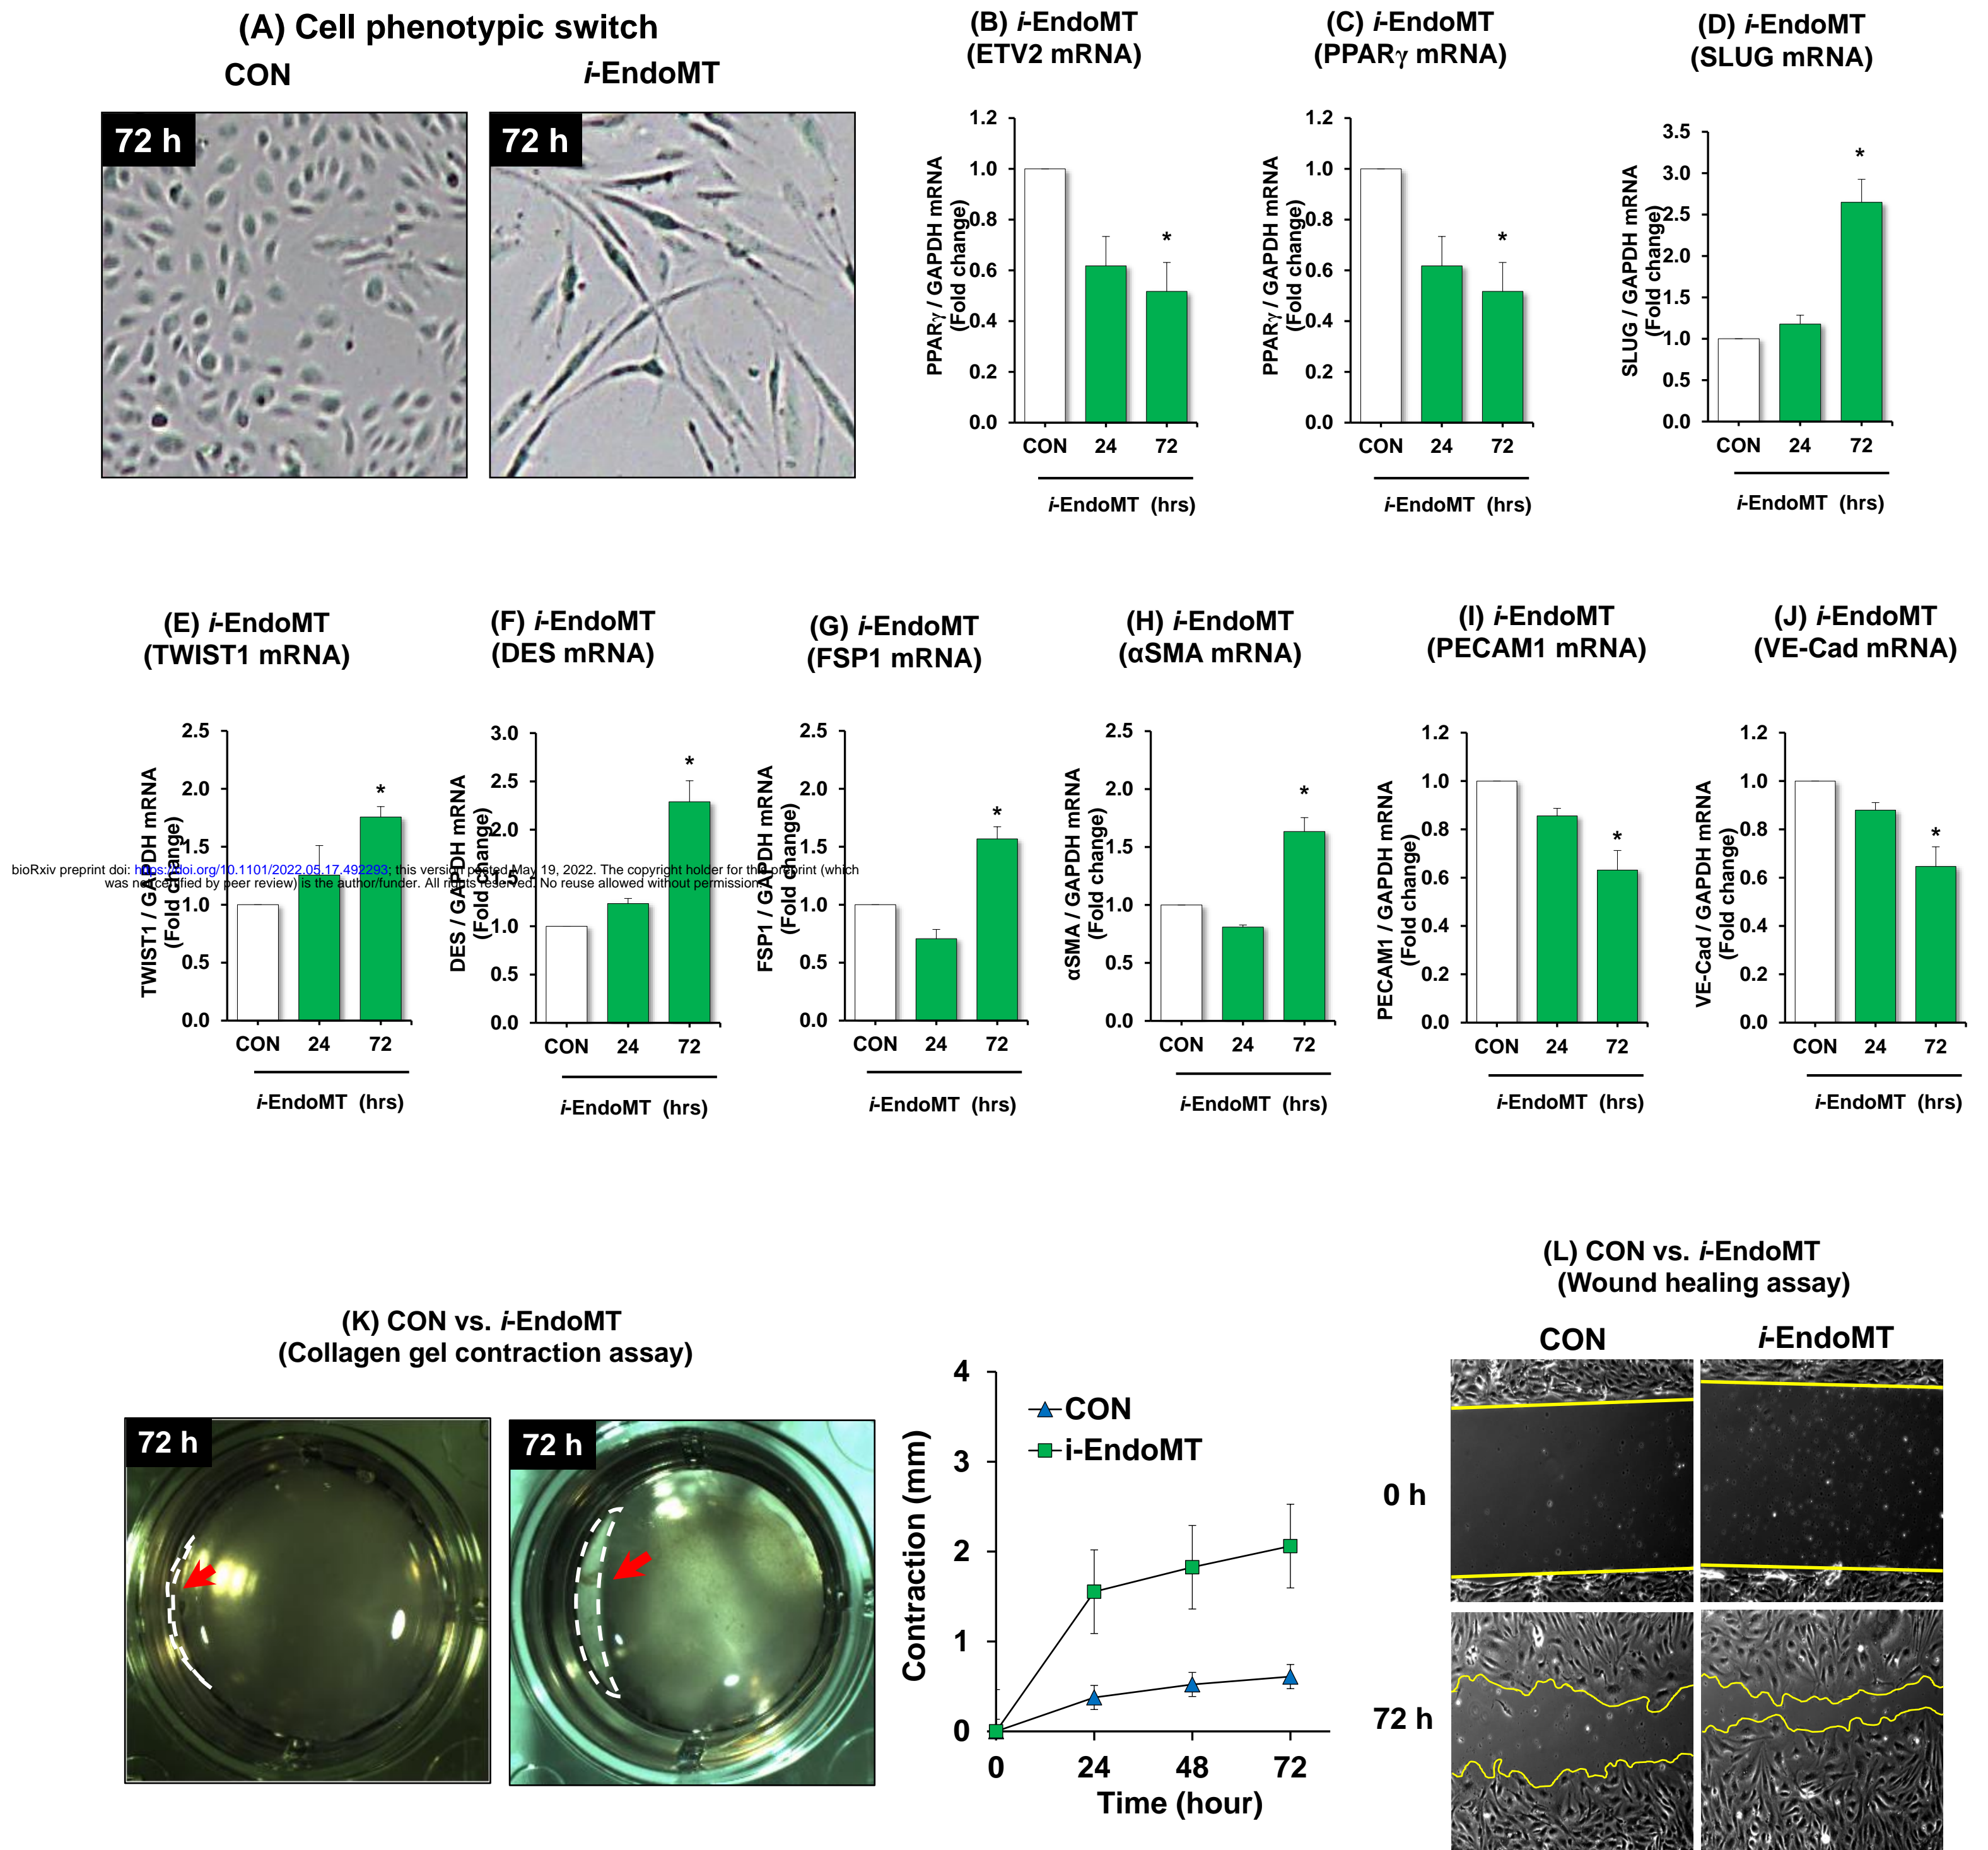

**Fig. 6**

**(A) *i*-EndoMT ± oxETV2**

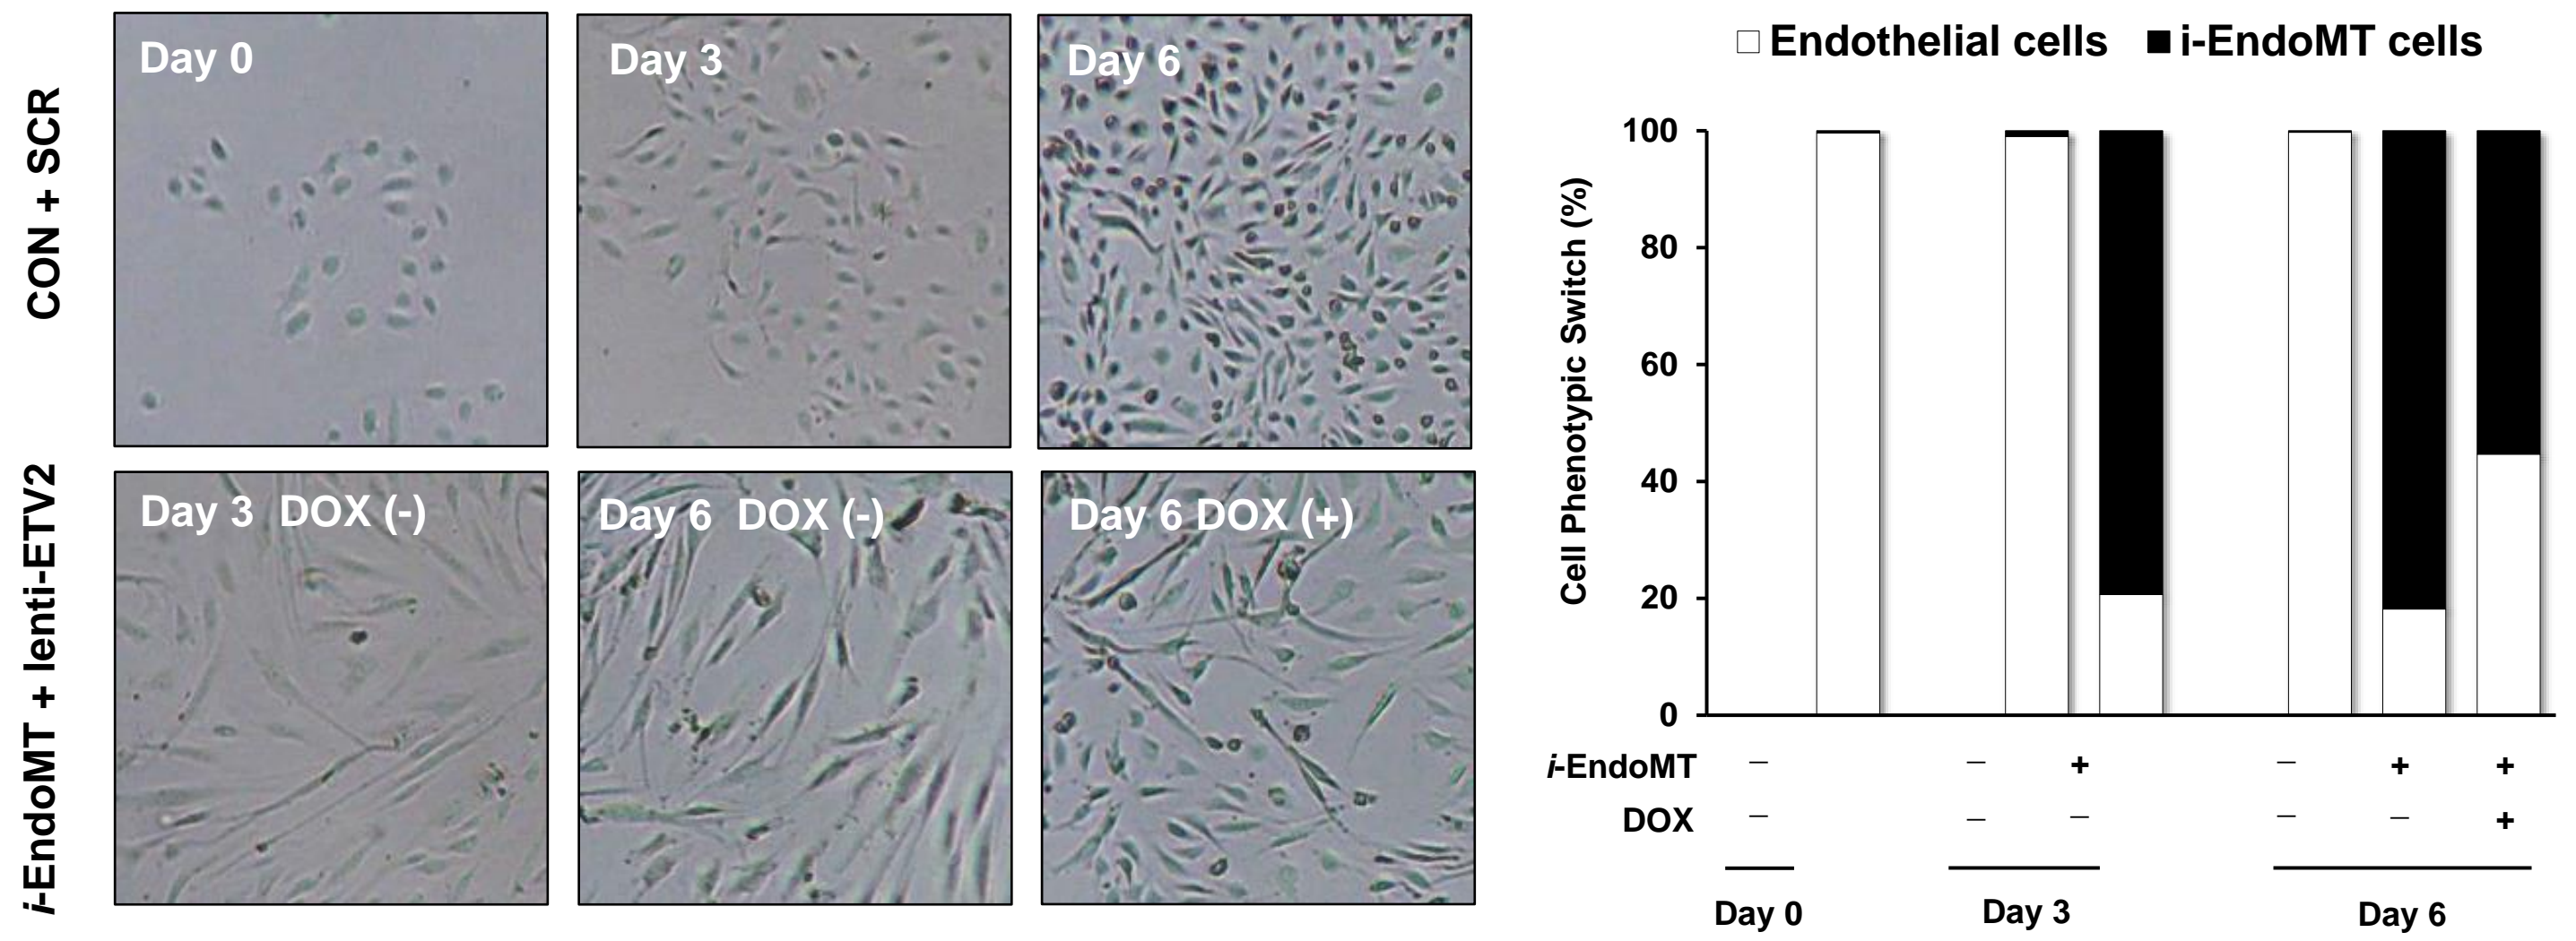

**(B) *i*-EndoMT ± oxETV2  
(EndoMT and EC markers, IHC)**

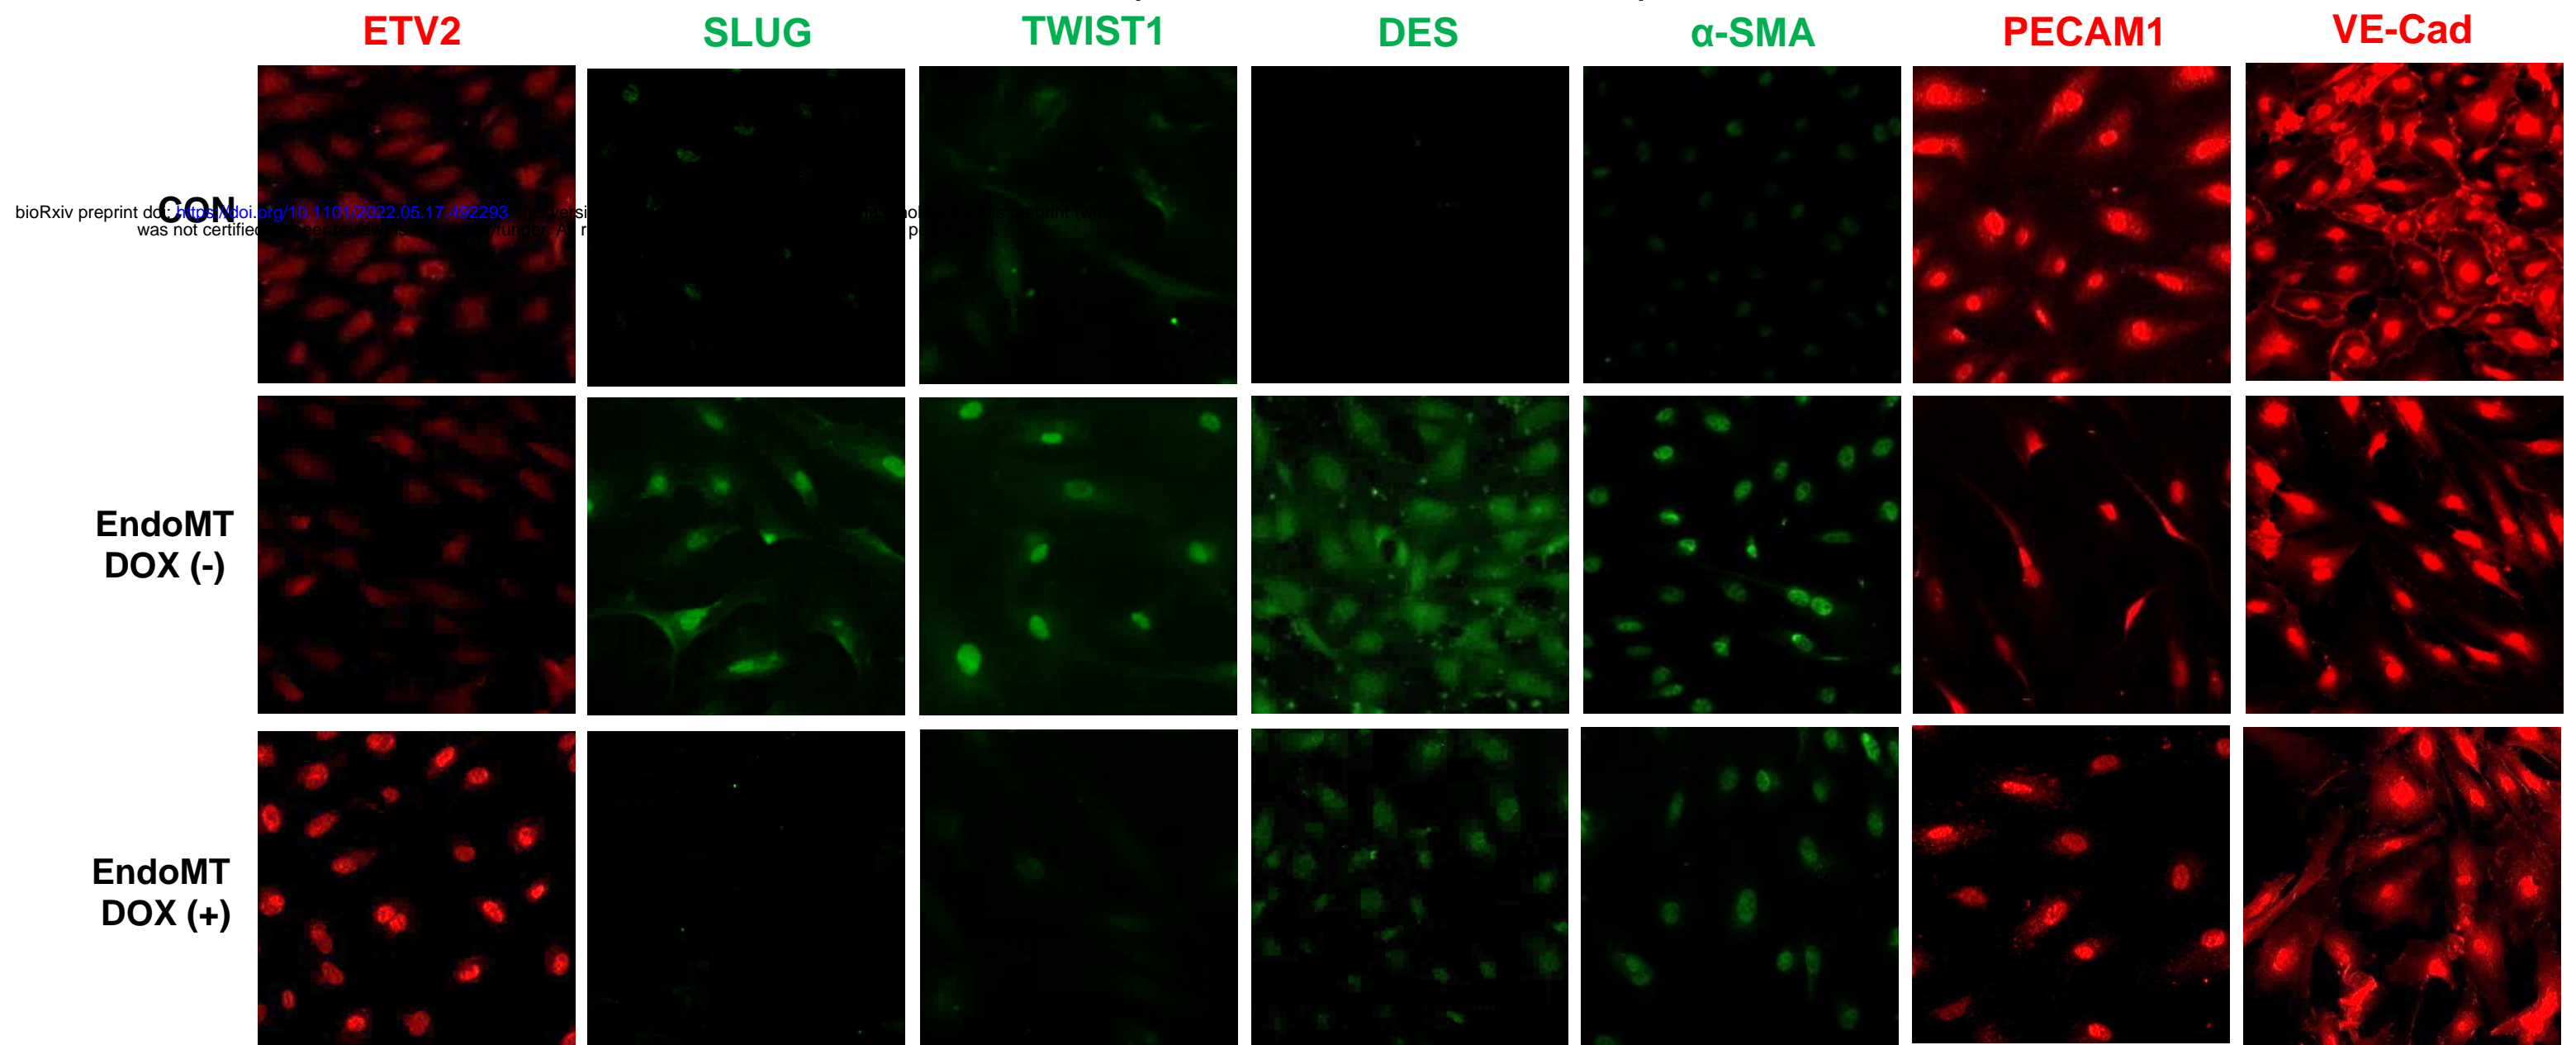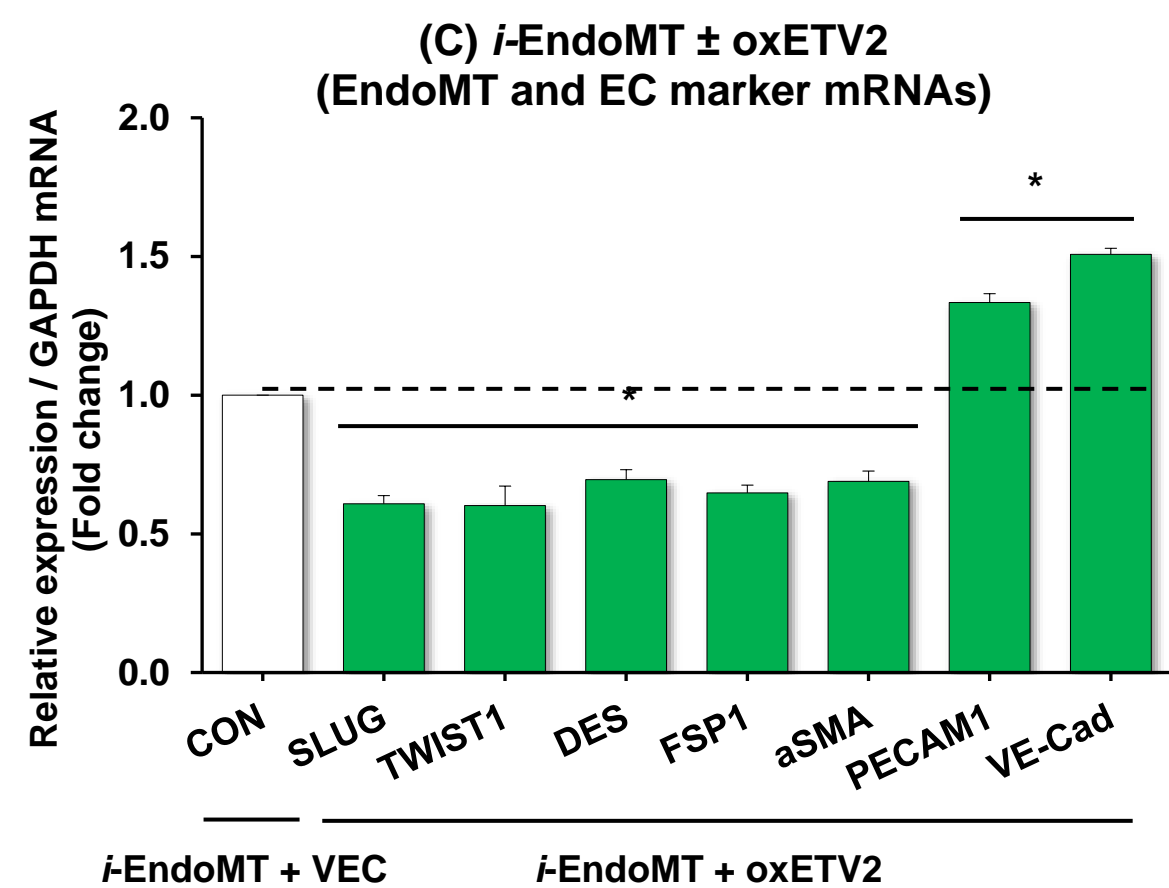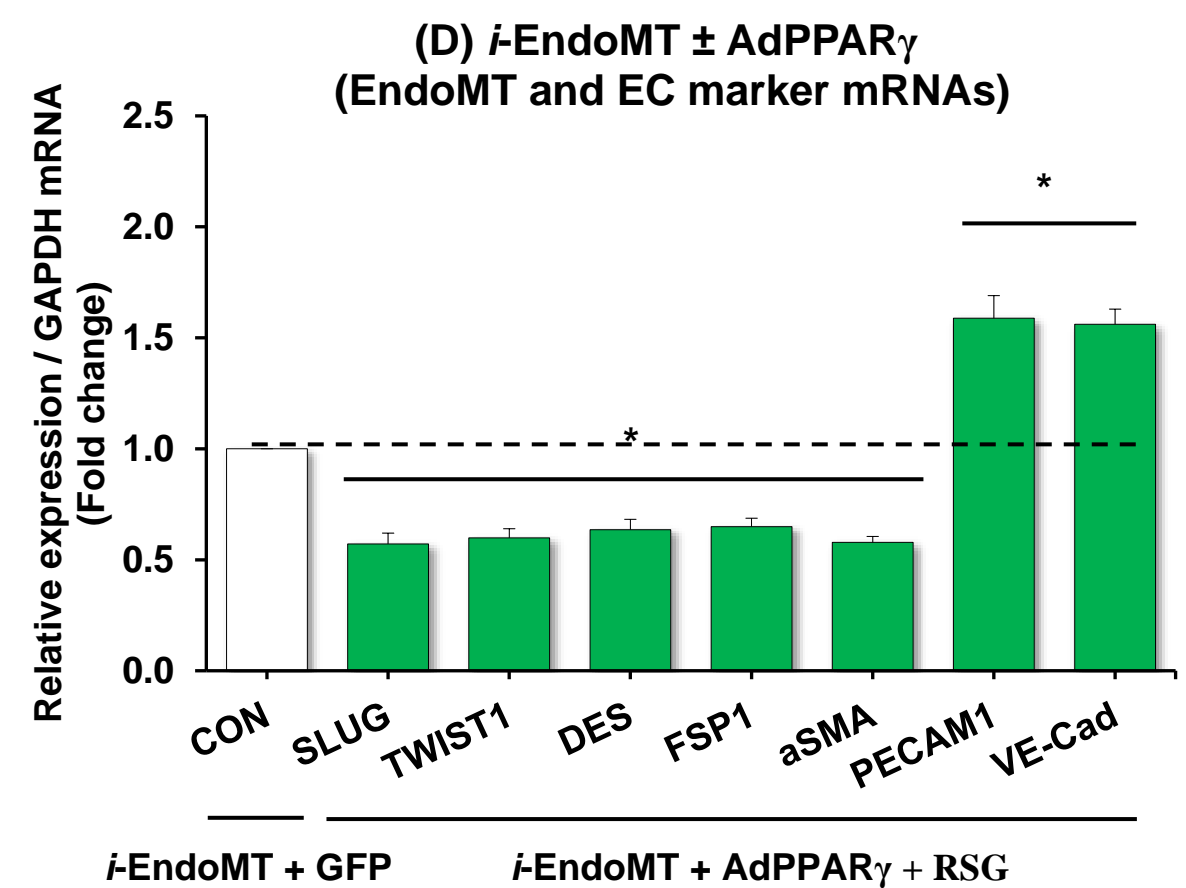

### (E) Cell phenotypic switch

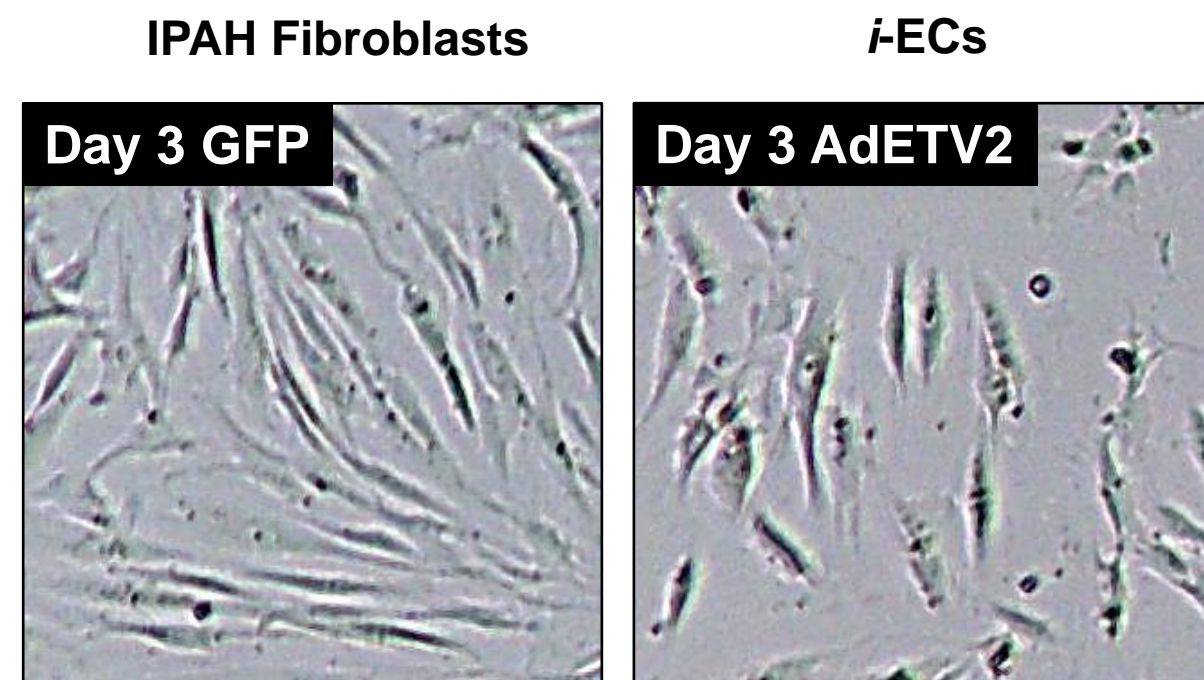

### (F) IPAH fibroblasts ± AdETV2 (ETV2 mRNA)

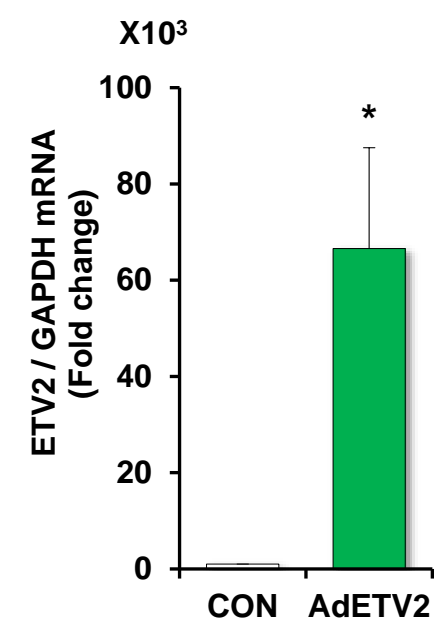

### (G) IPAH fibroblasts ± AdETV2 (EndoMT and EC marker mRNAs)

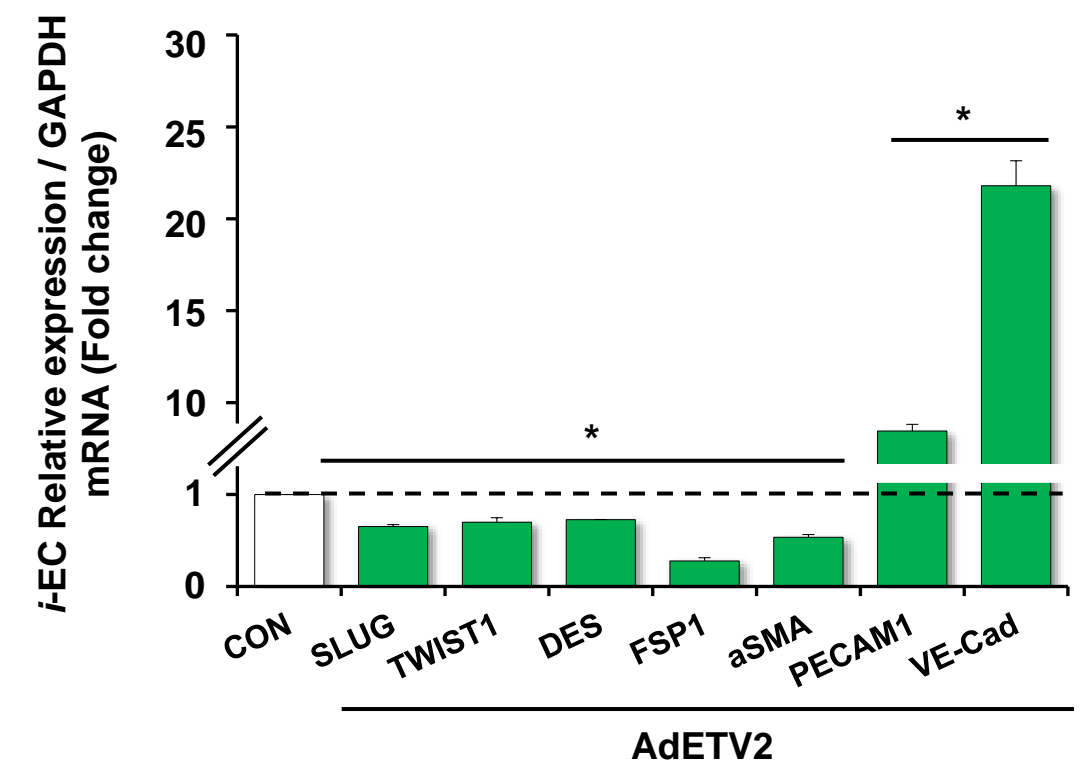

### (H) Rat pulmonary artery Relaxation

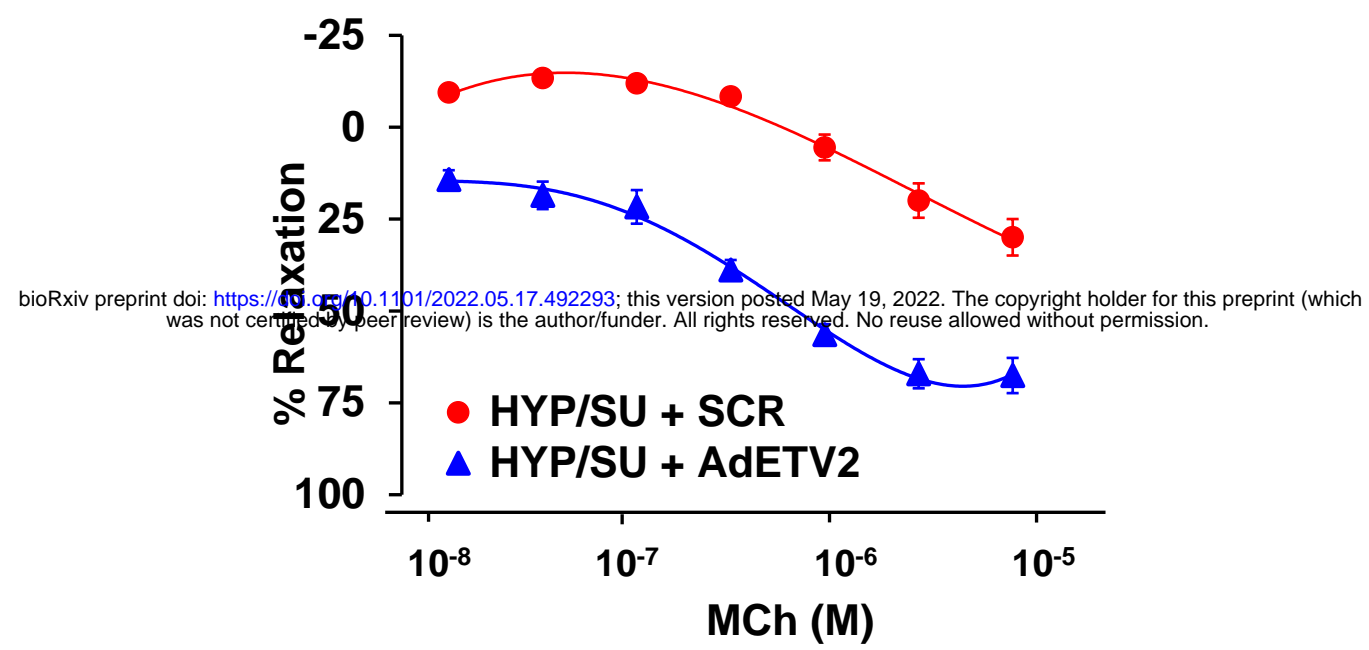

### (I) Schematic summary

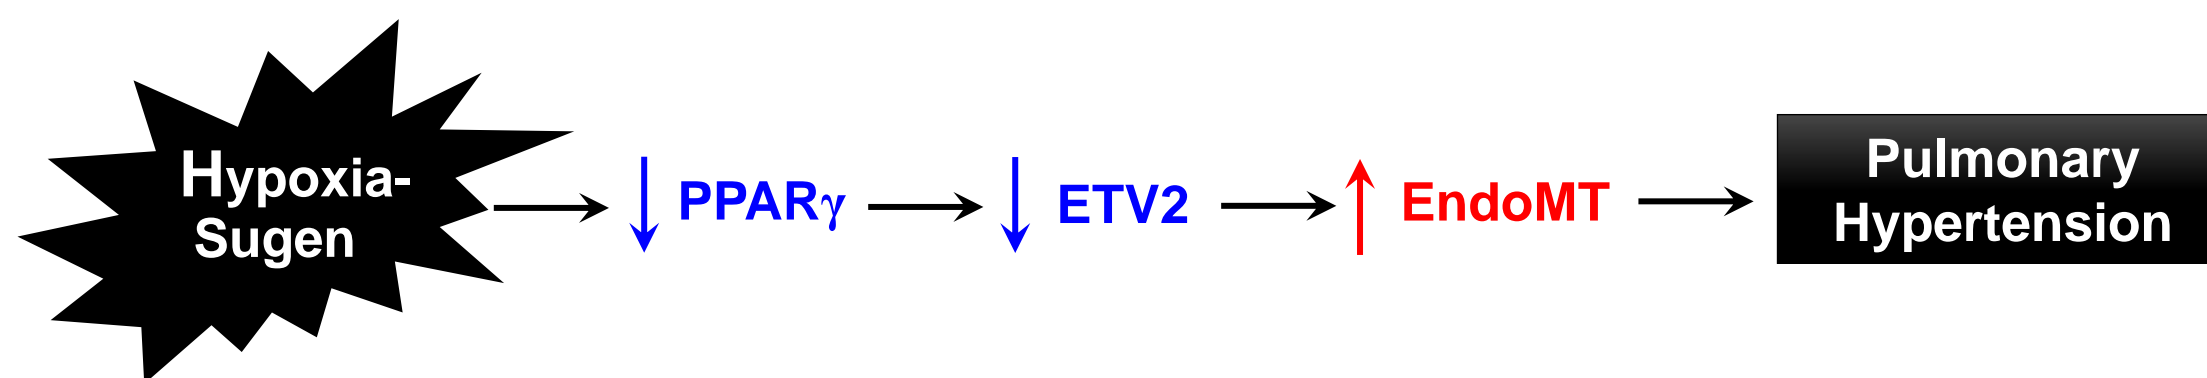

Source: https://www.biorxiv.org/content/10.1101/2022.05.17.492293v1.full.pdf
